# Supplementary material
Source: PubMed Central journal article supplement (PMC2746772)
Supplement: 00167.2009_2.pdf [file 00167.2009_2.pdf]

Frequency [Hz]

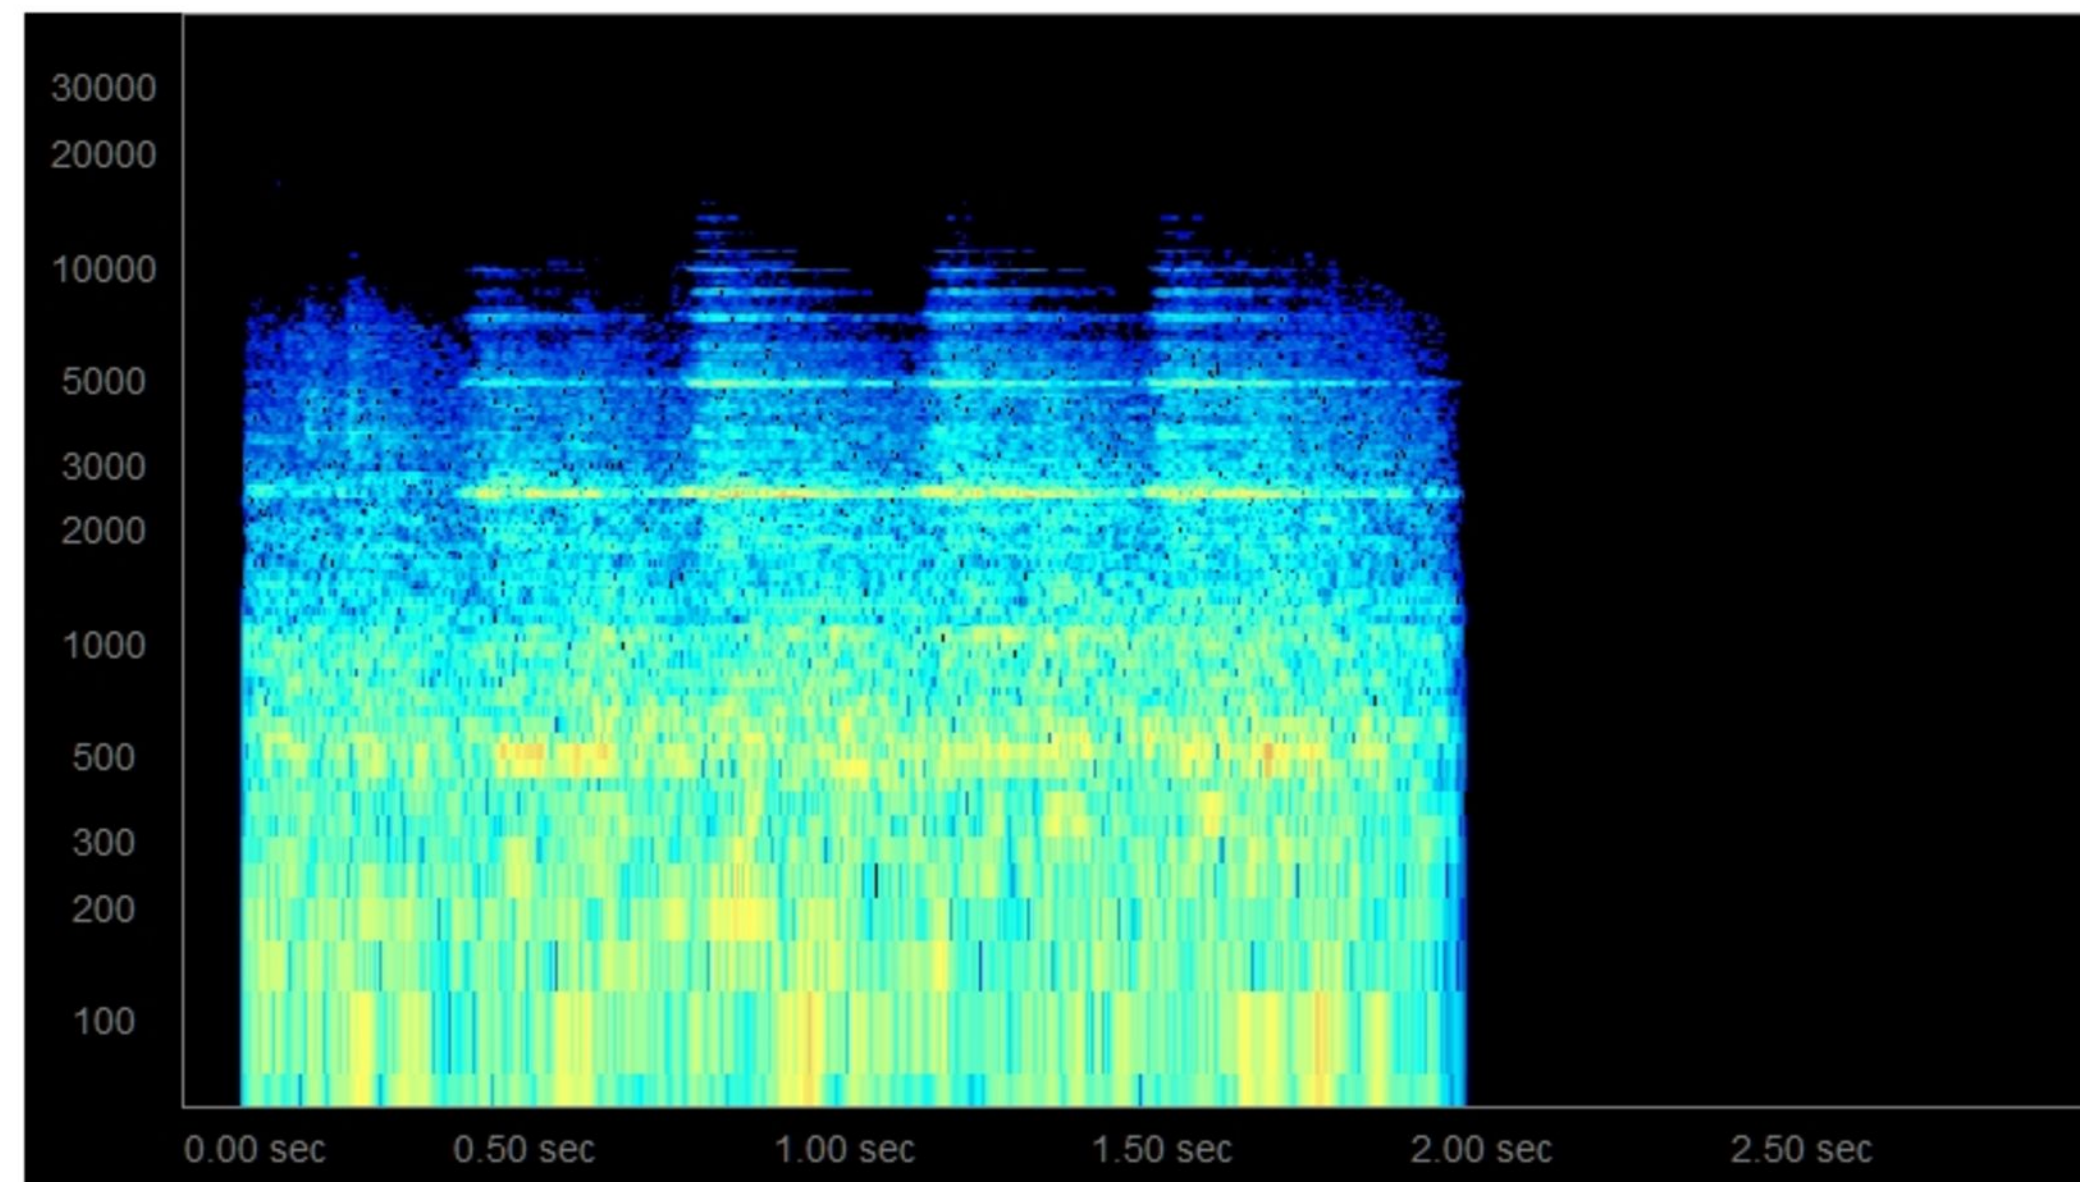

cage [sound of monkey swinging]

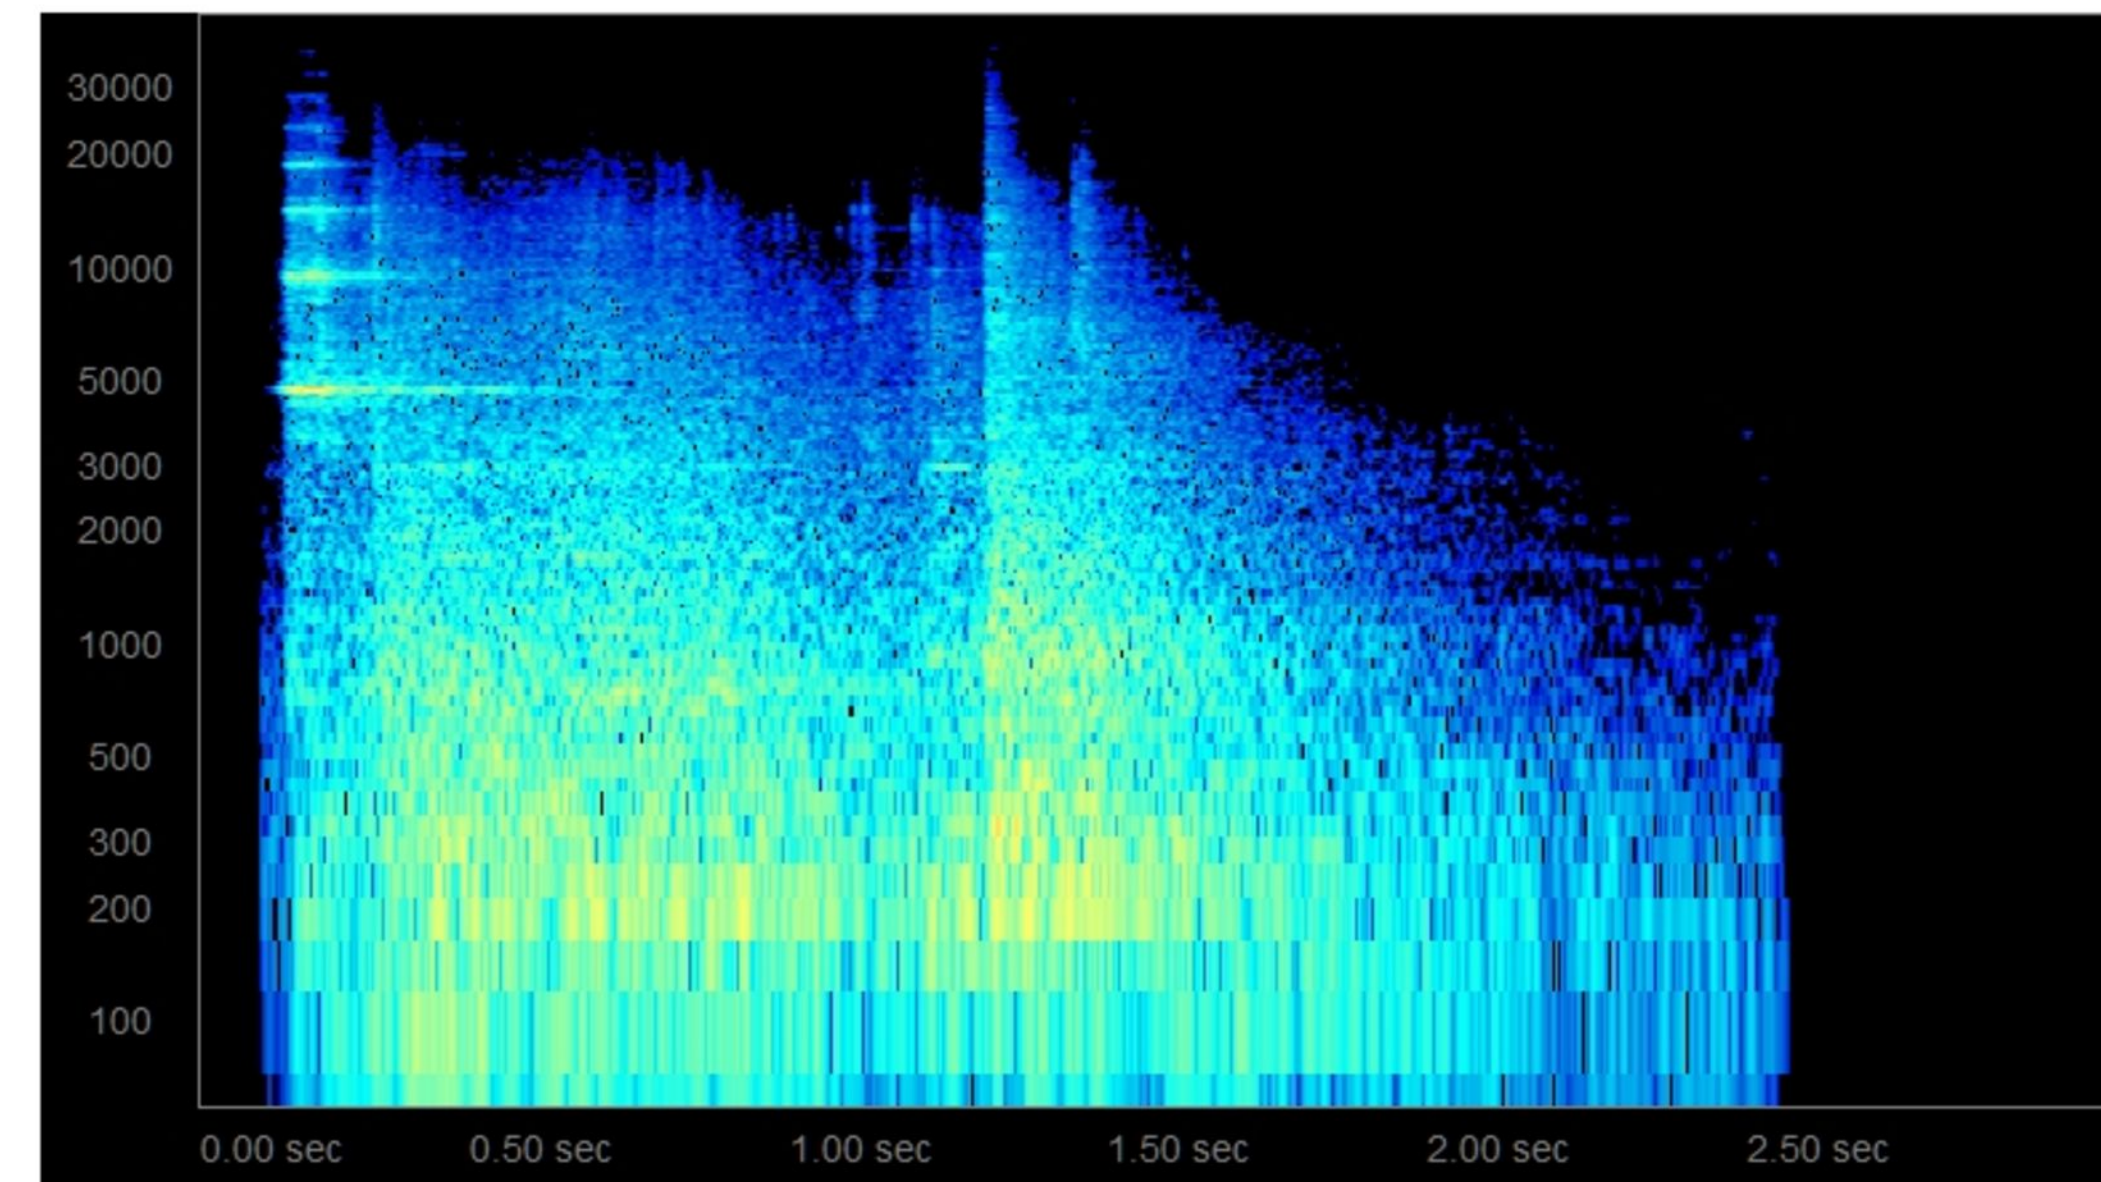

cage divider

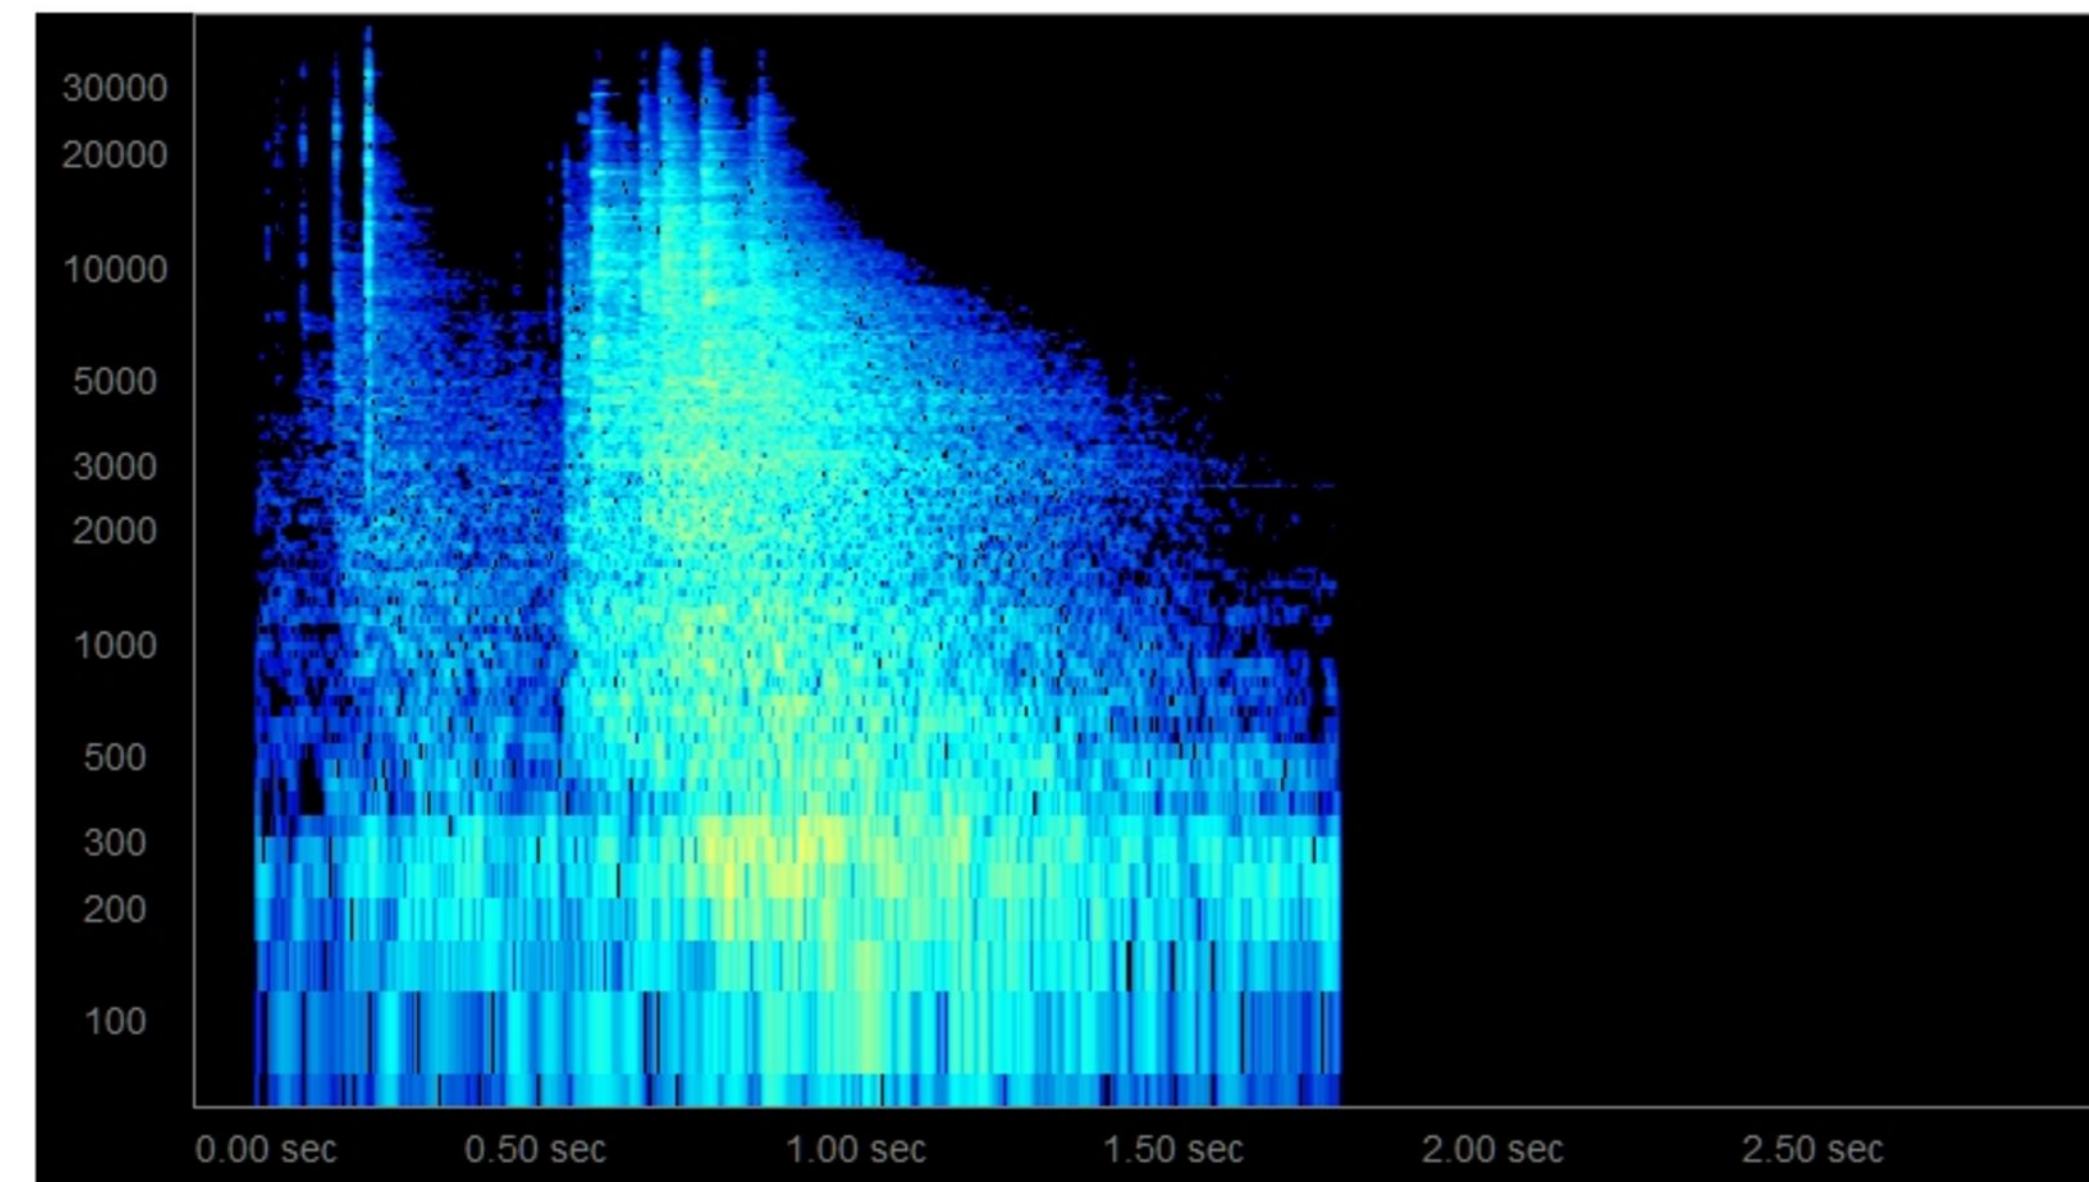

cage lock open

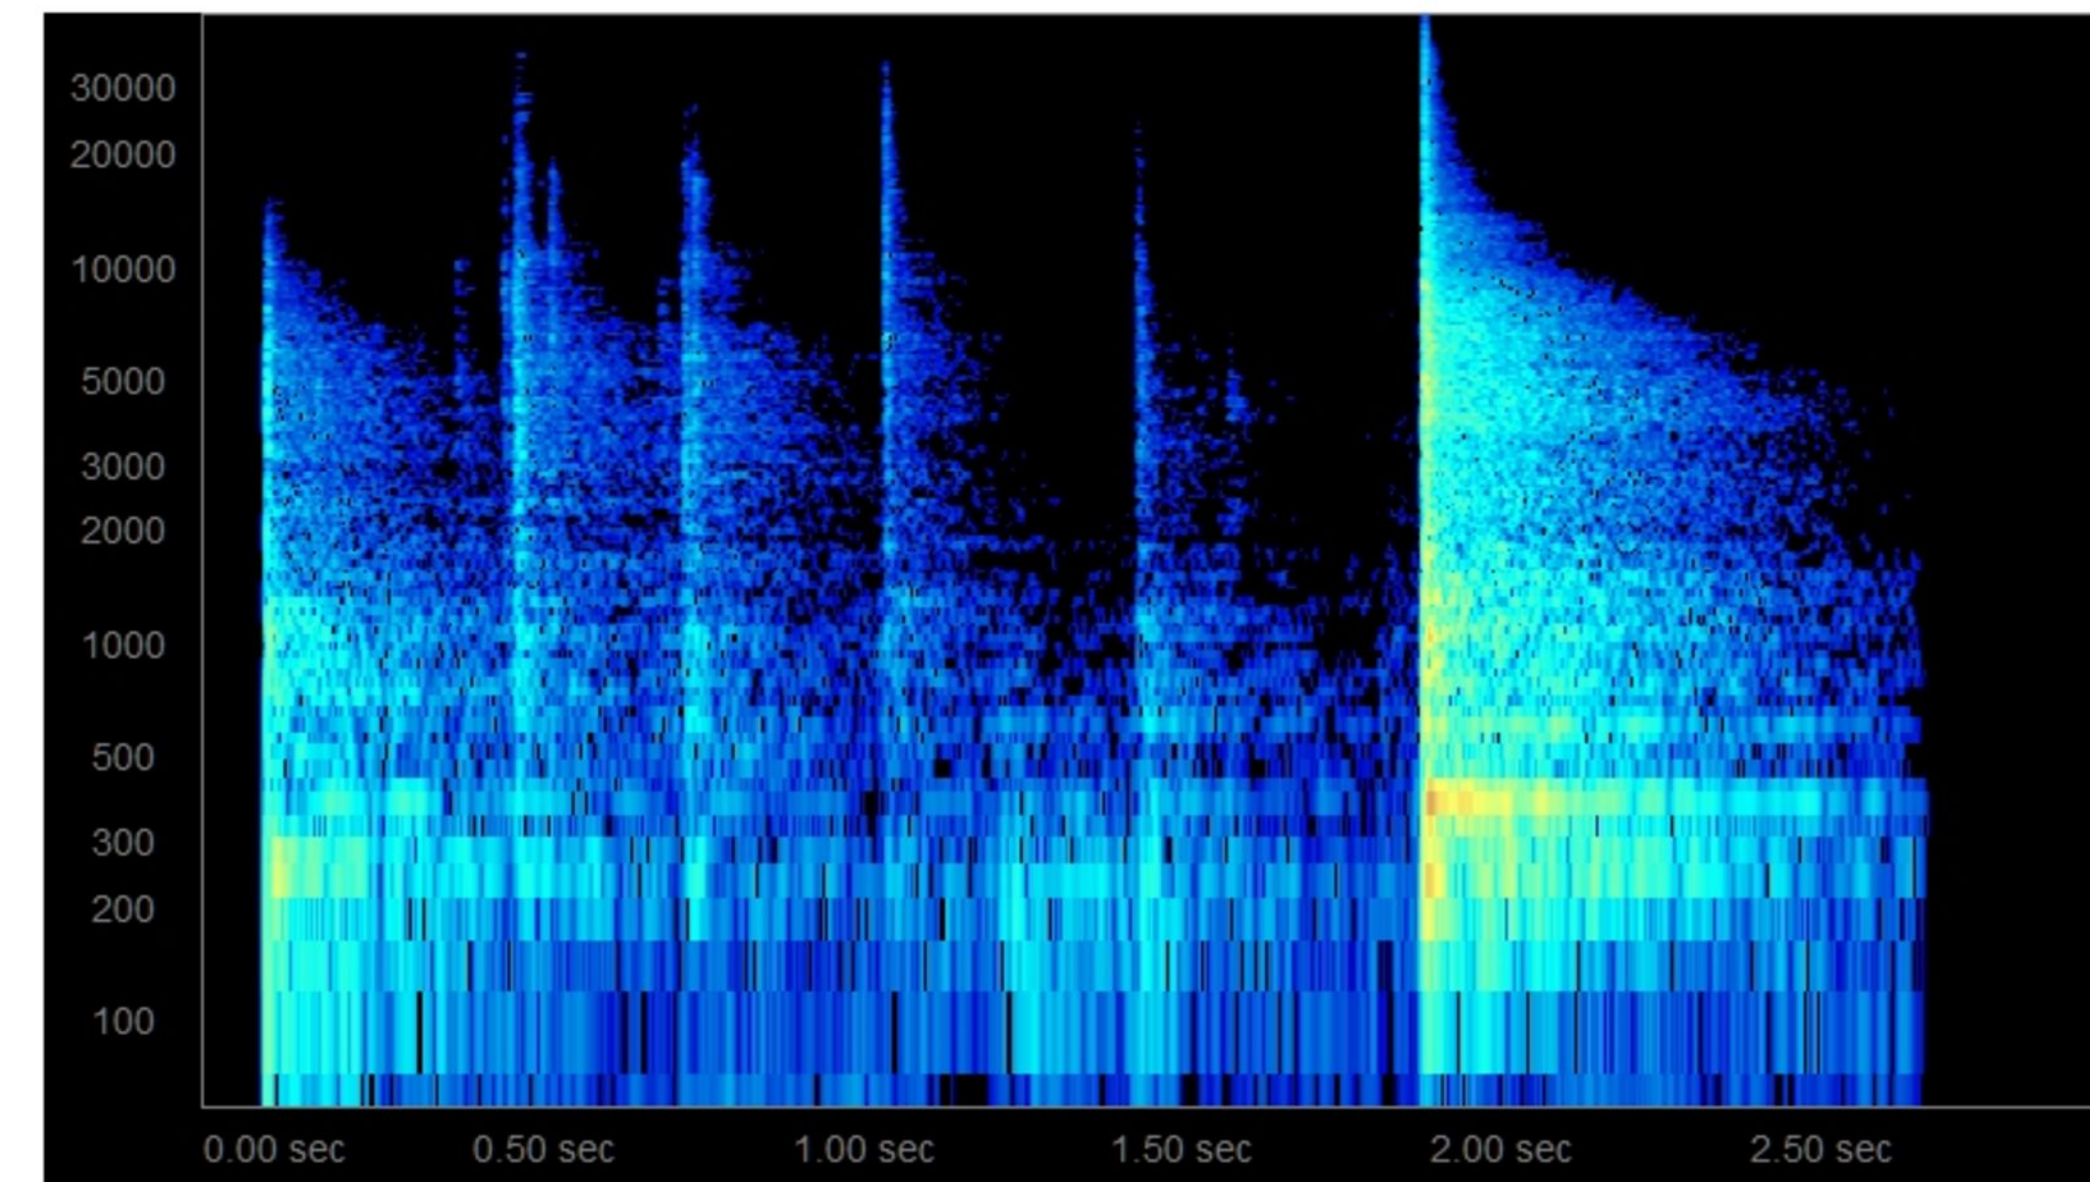

monkey chair latch close

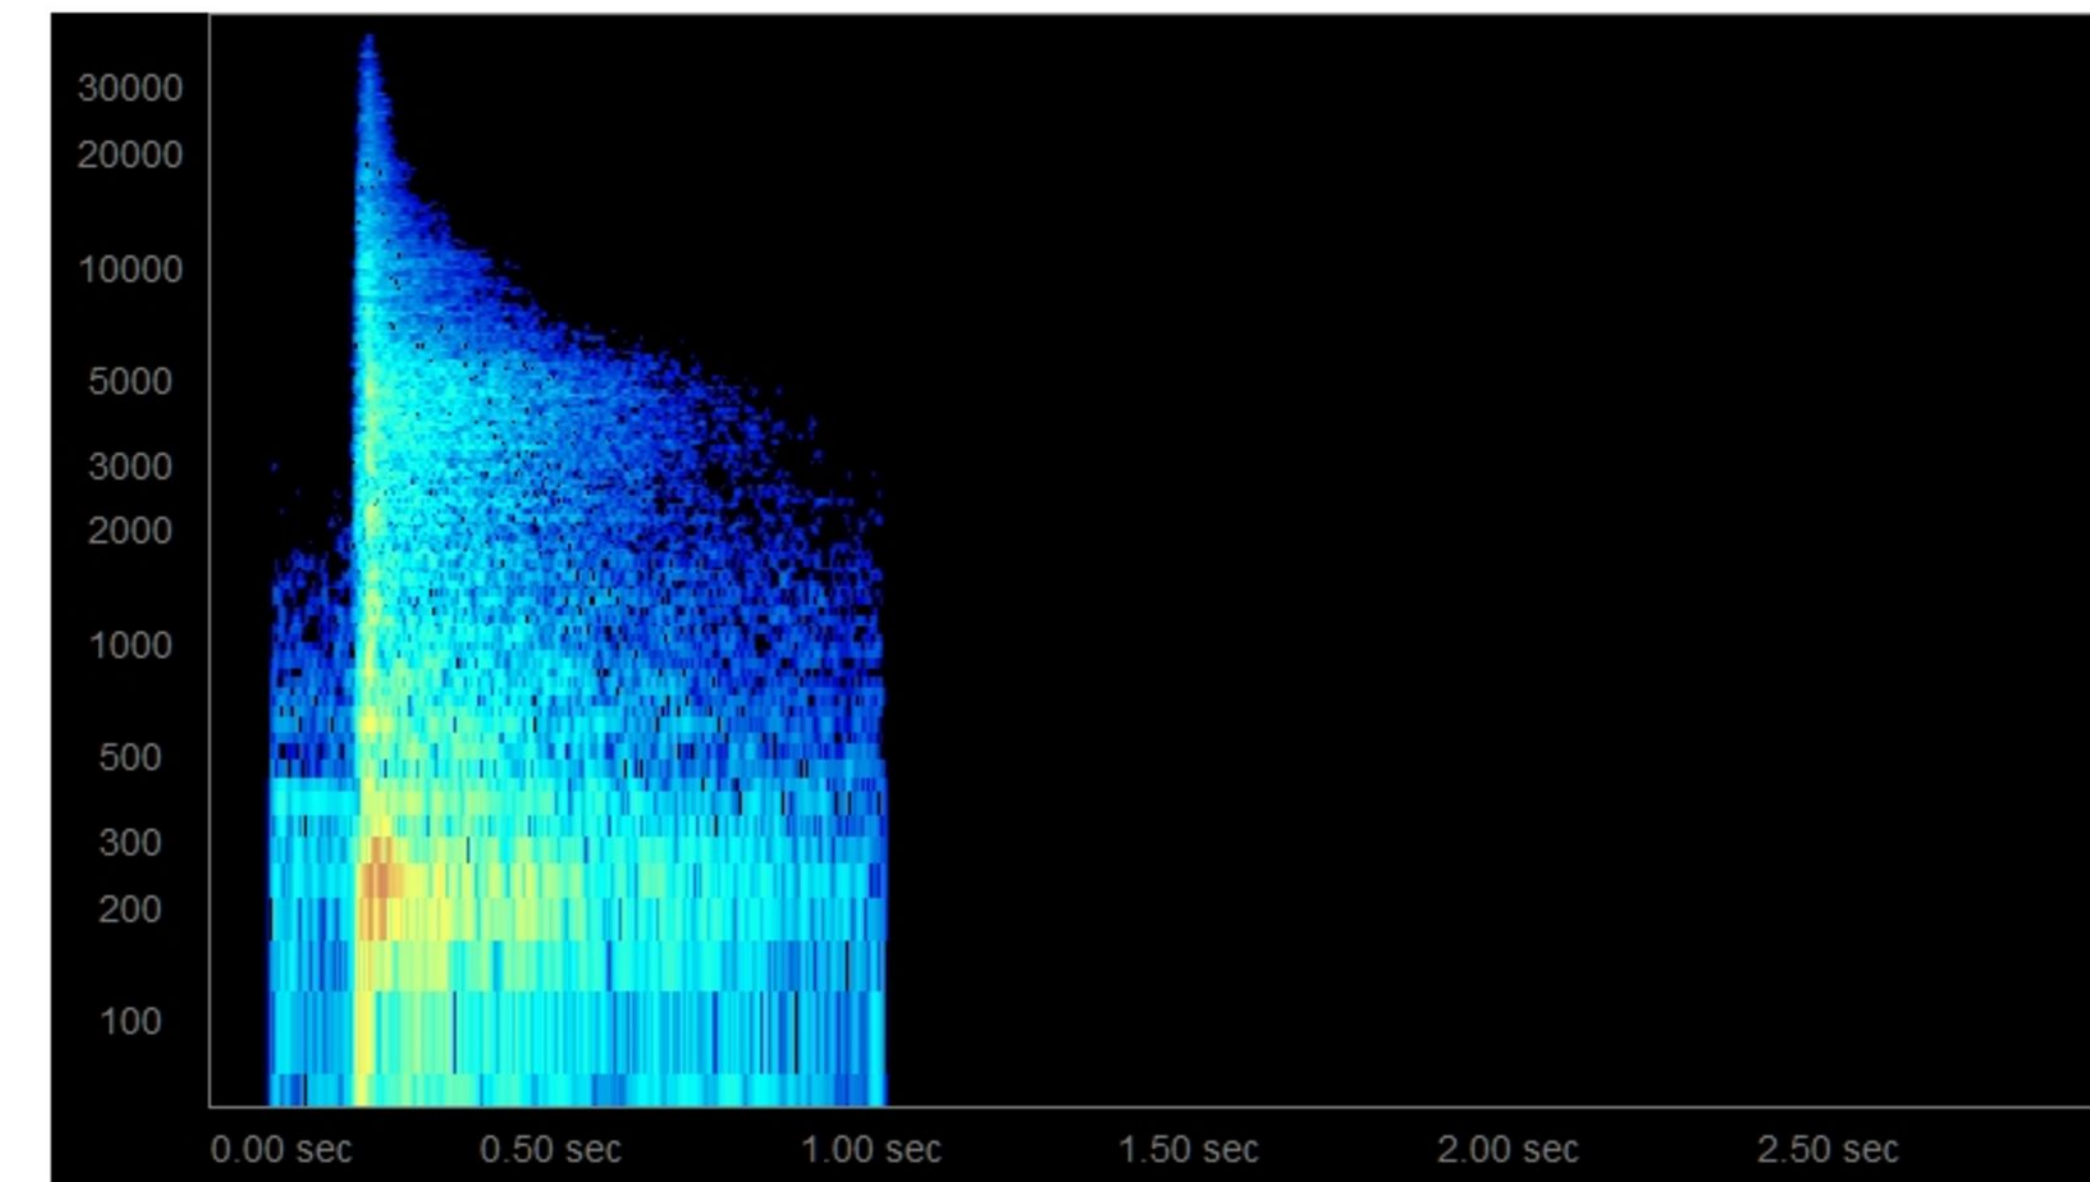

monkey chair latch open

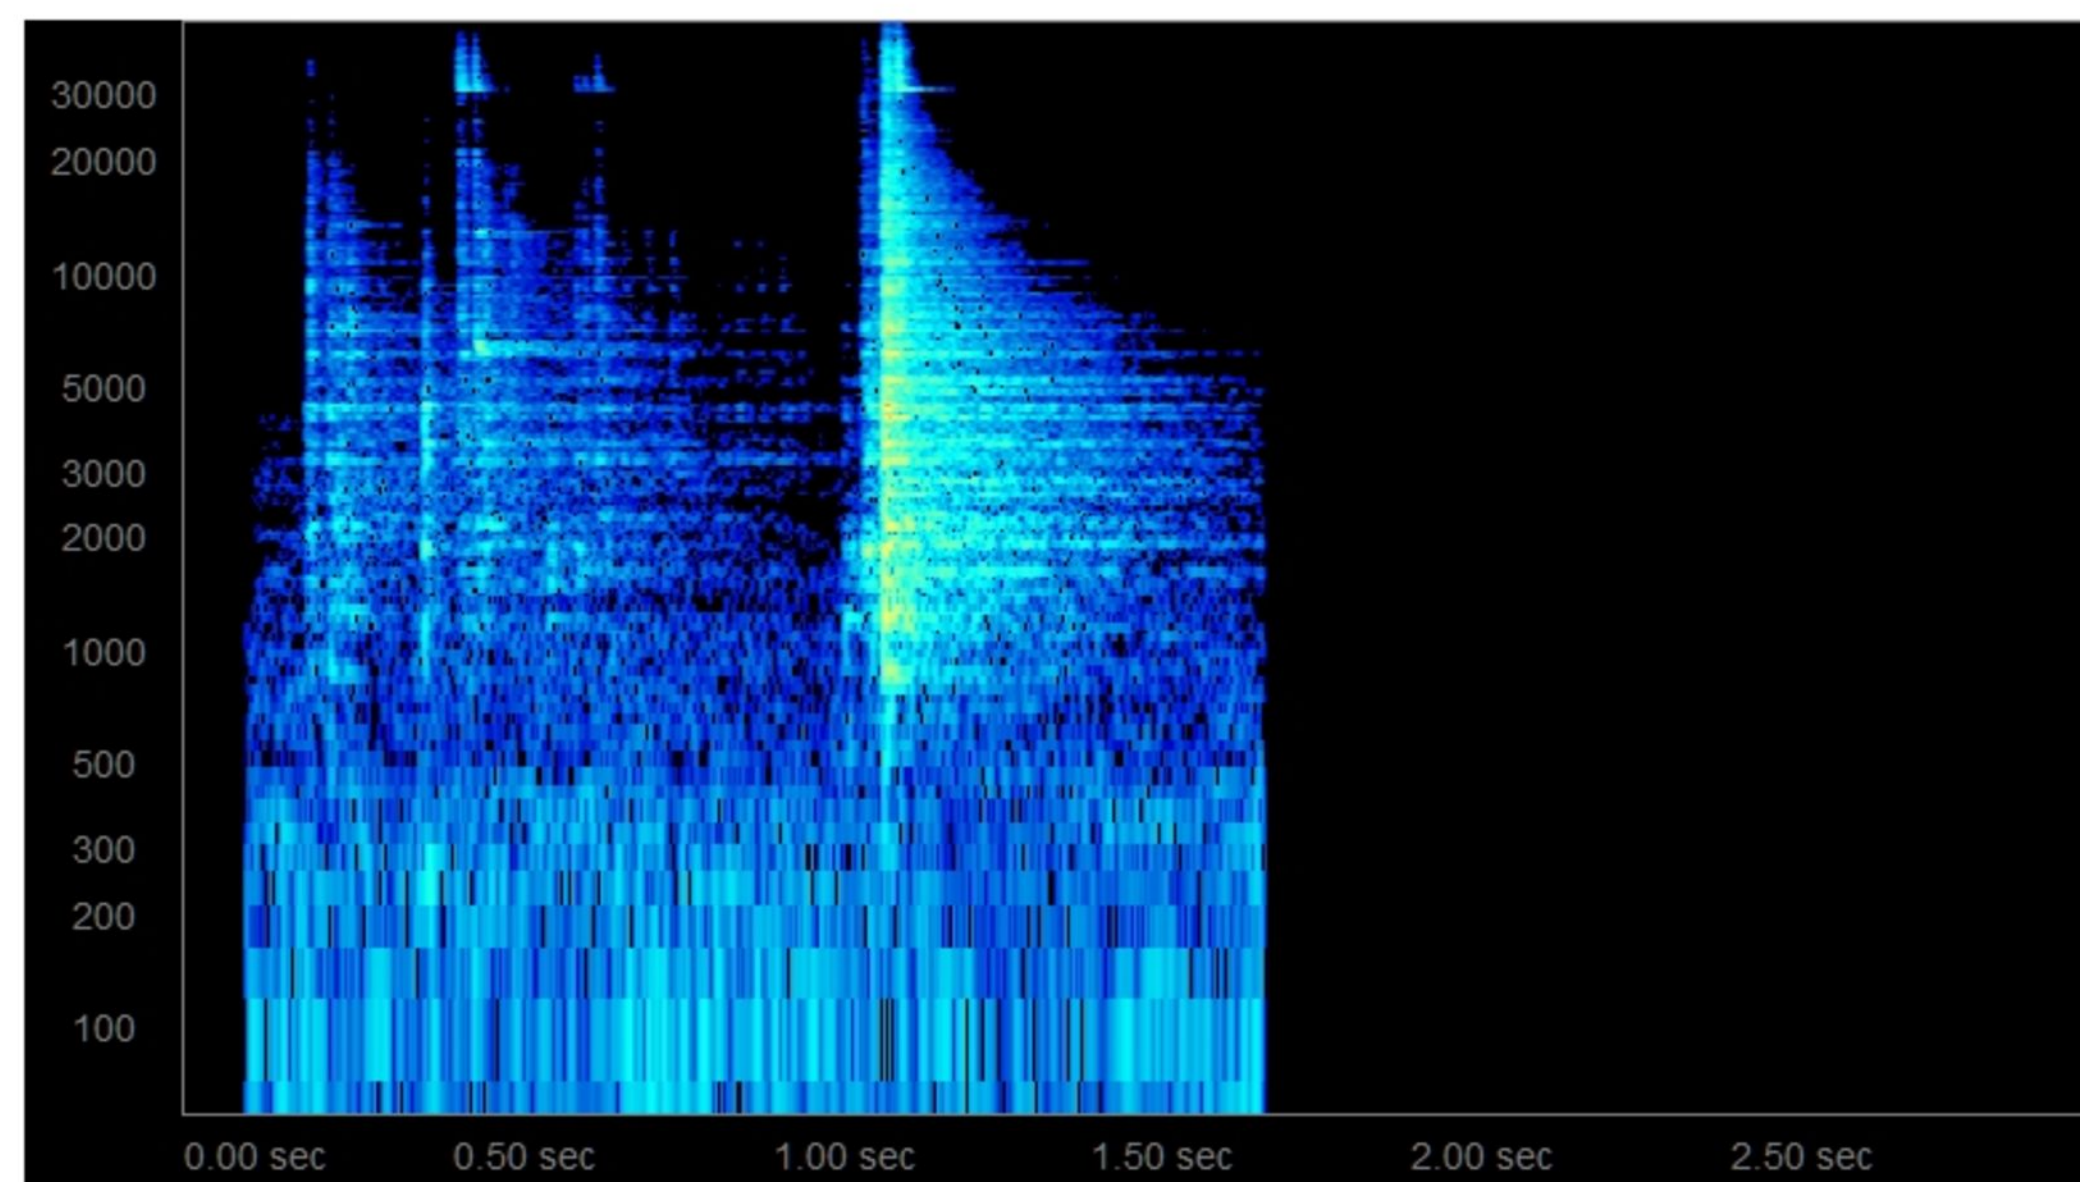

monkey pole latch

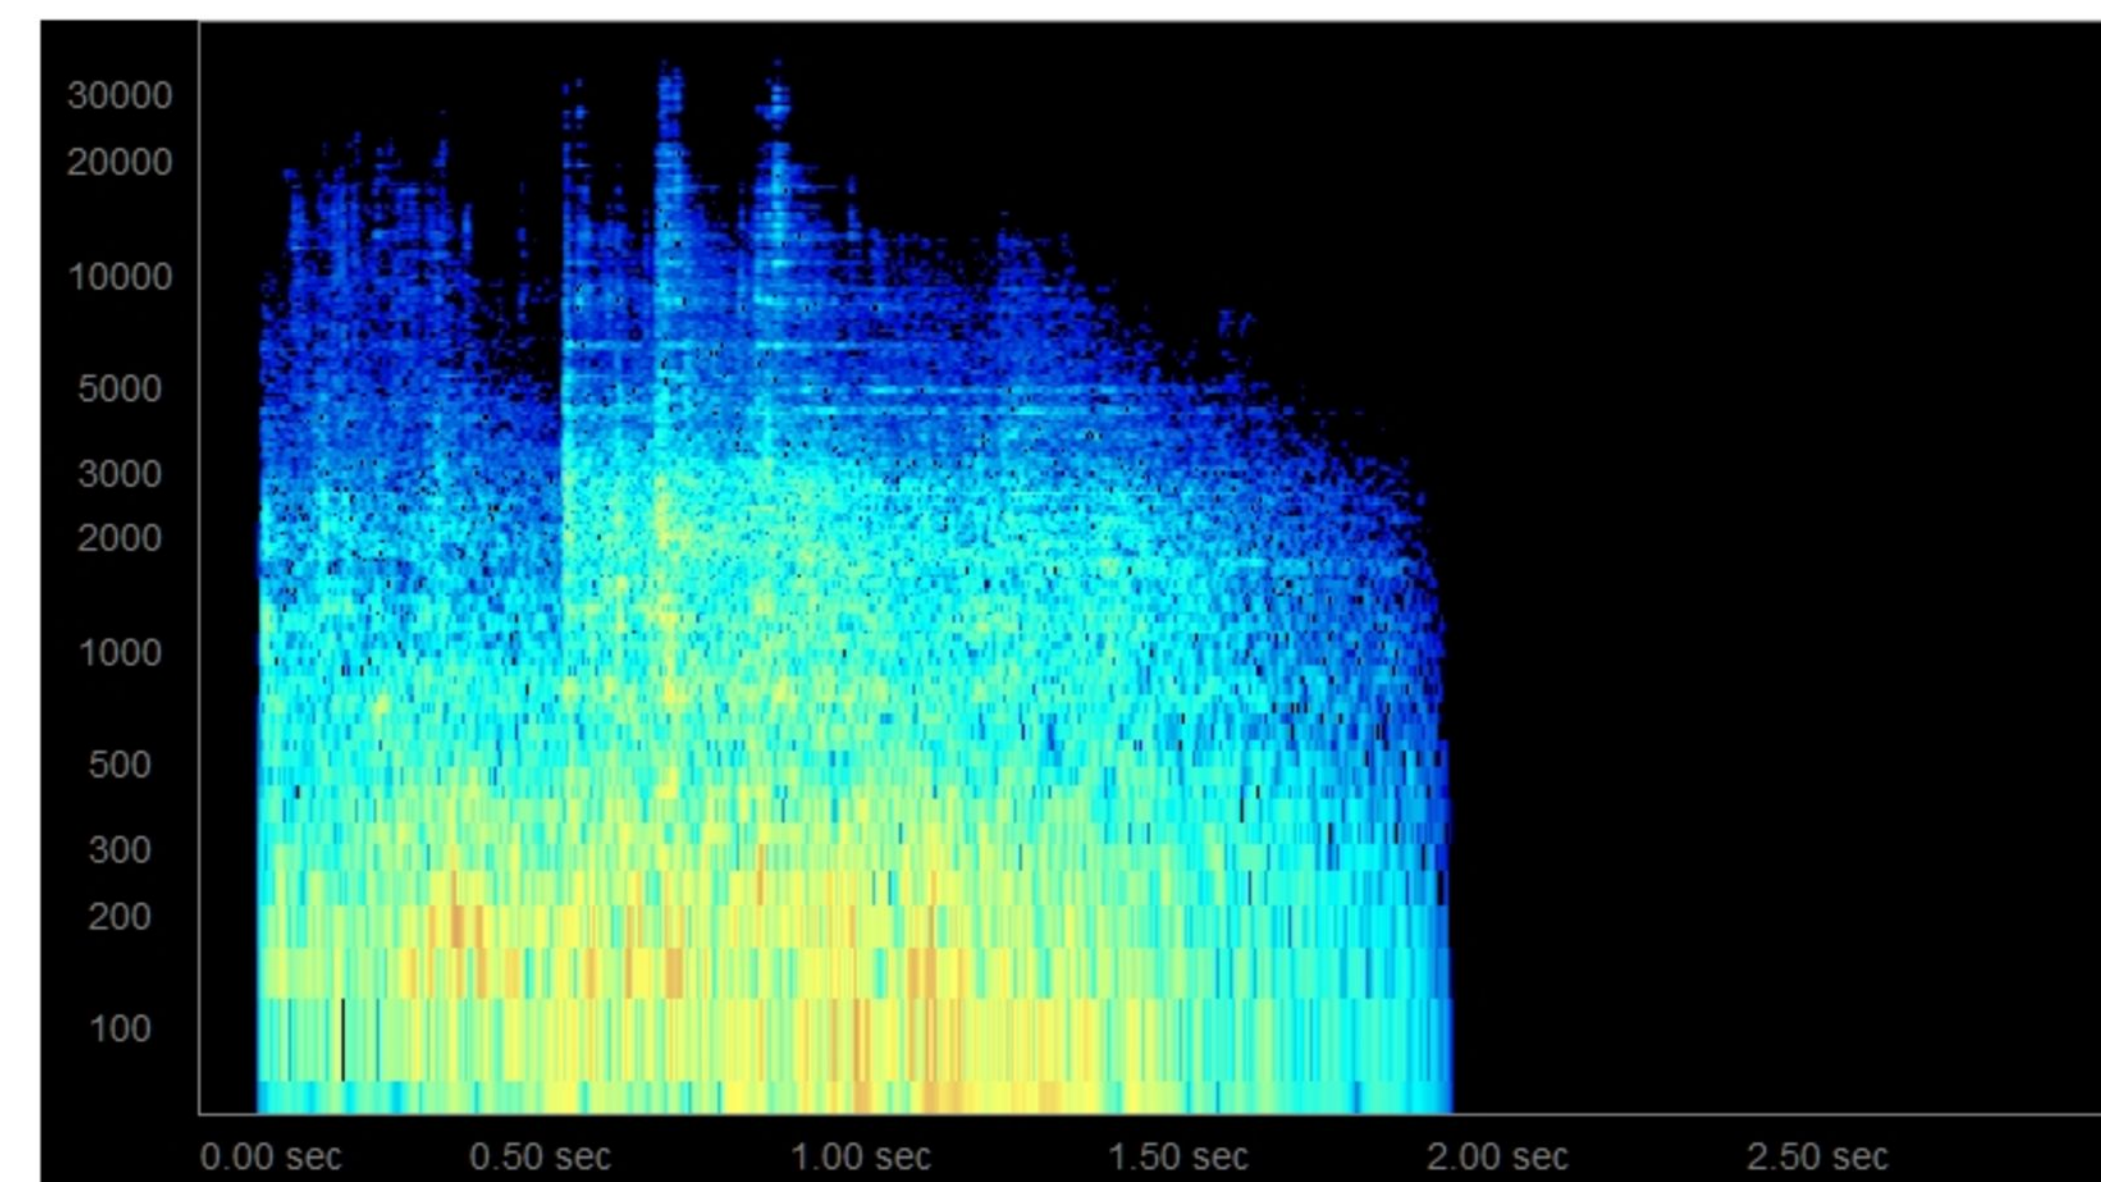

moving food container

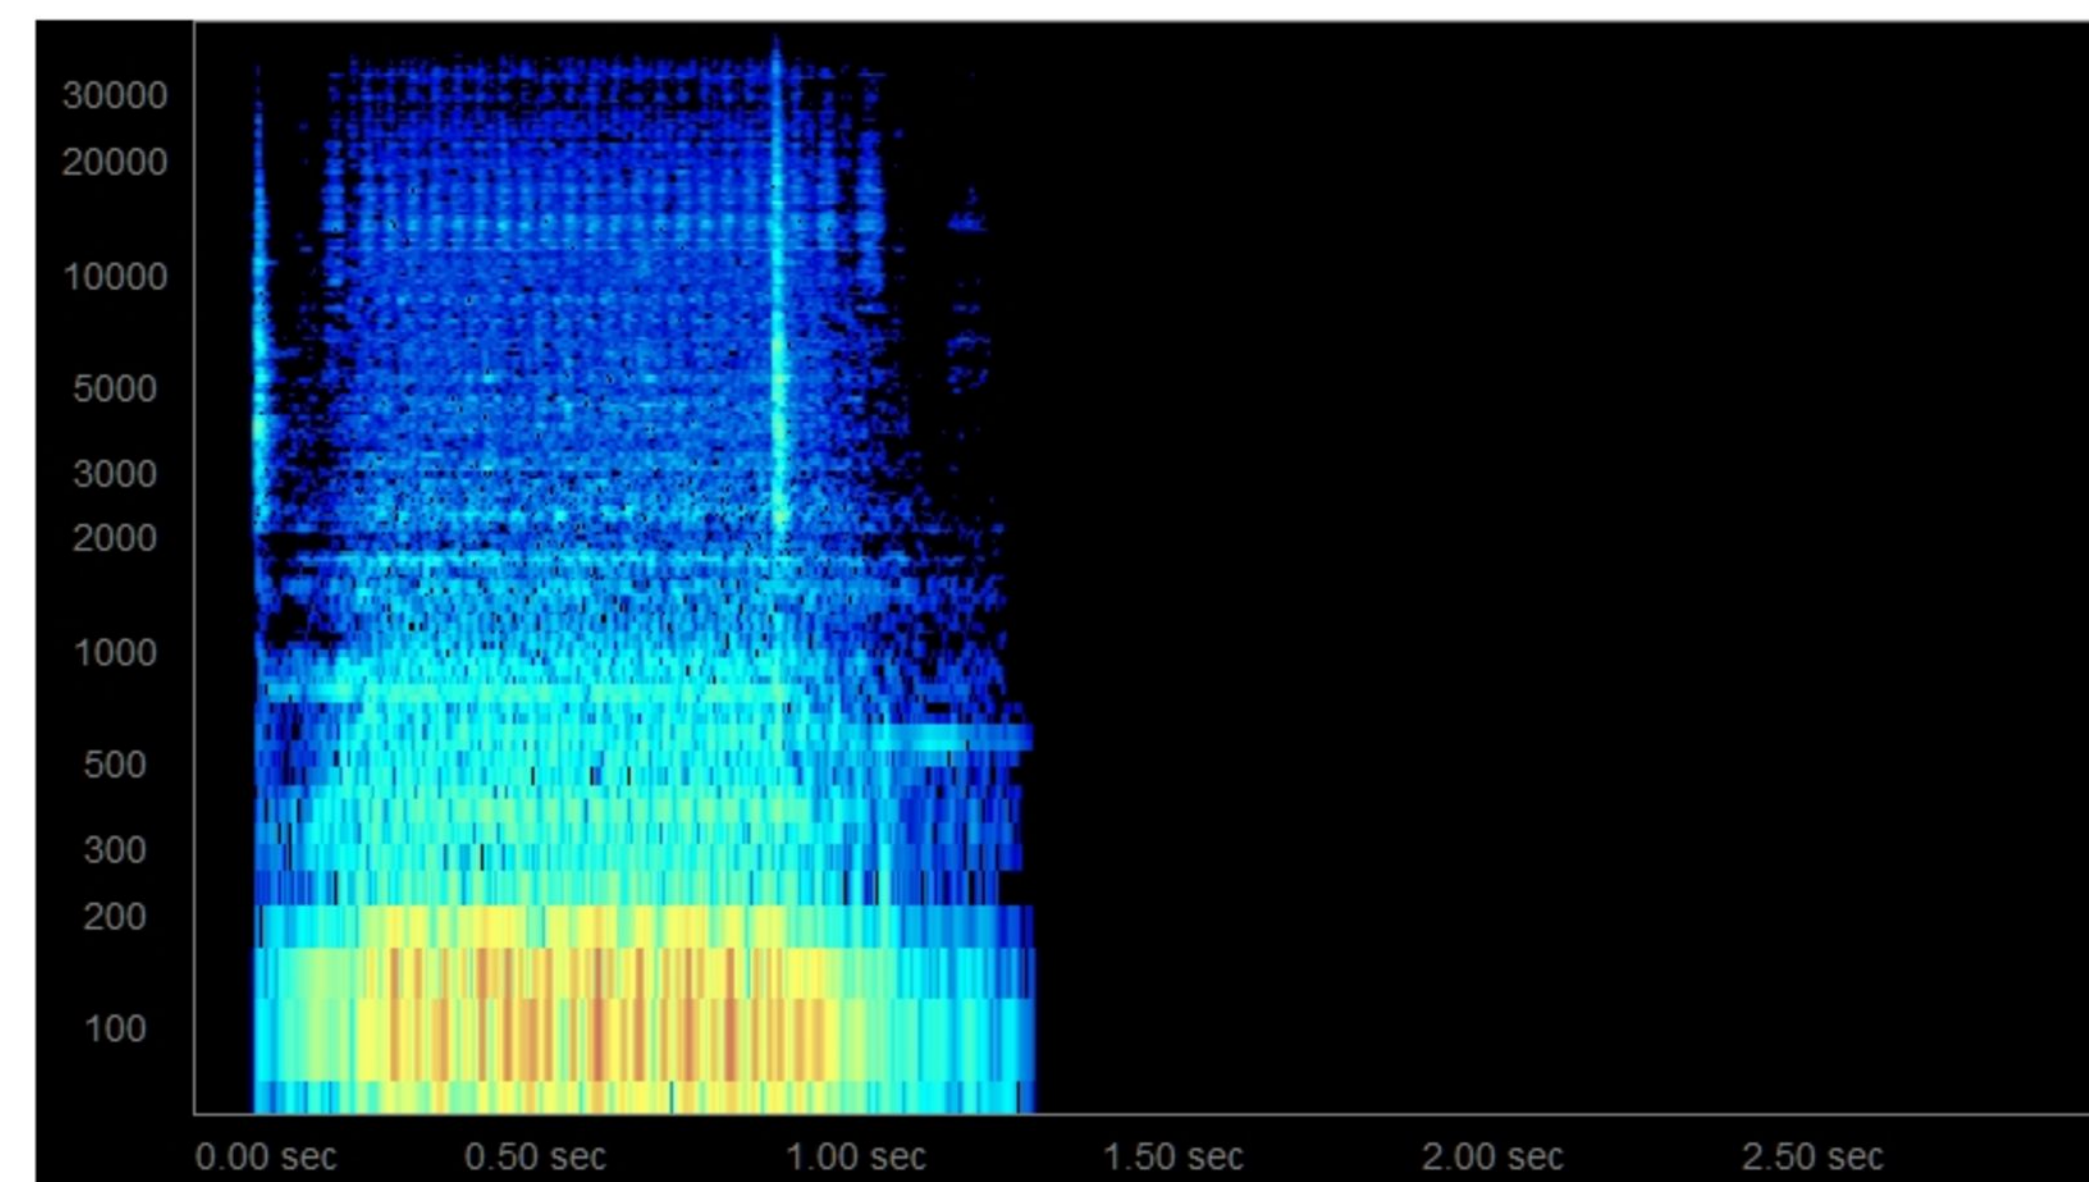

vacuum pump

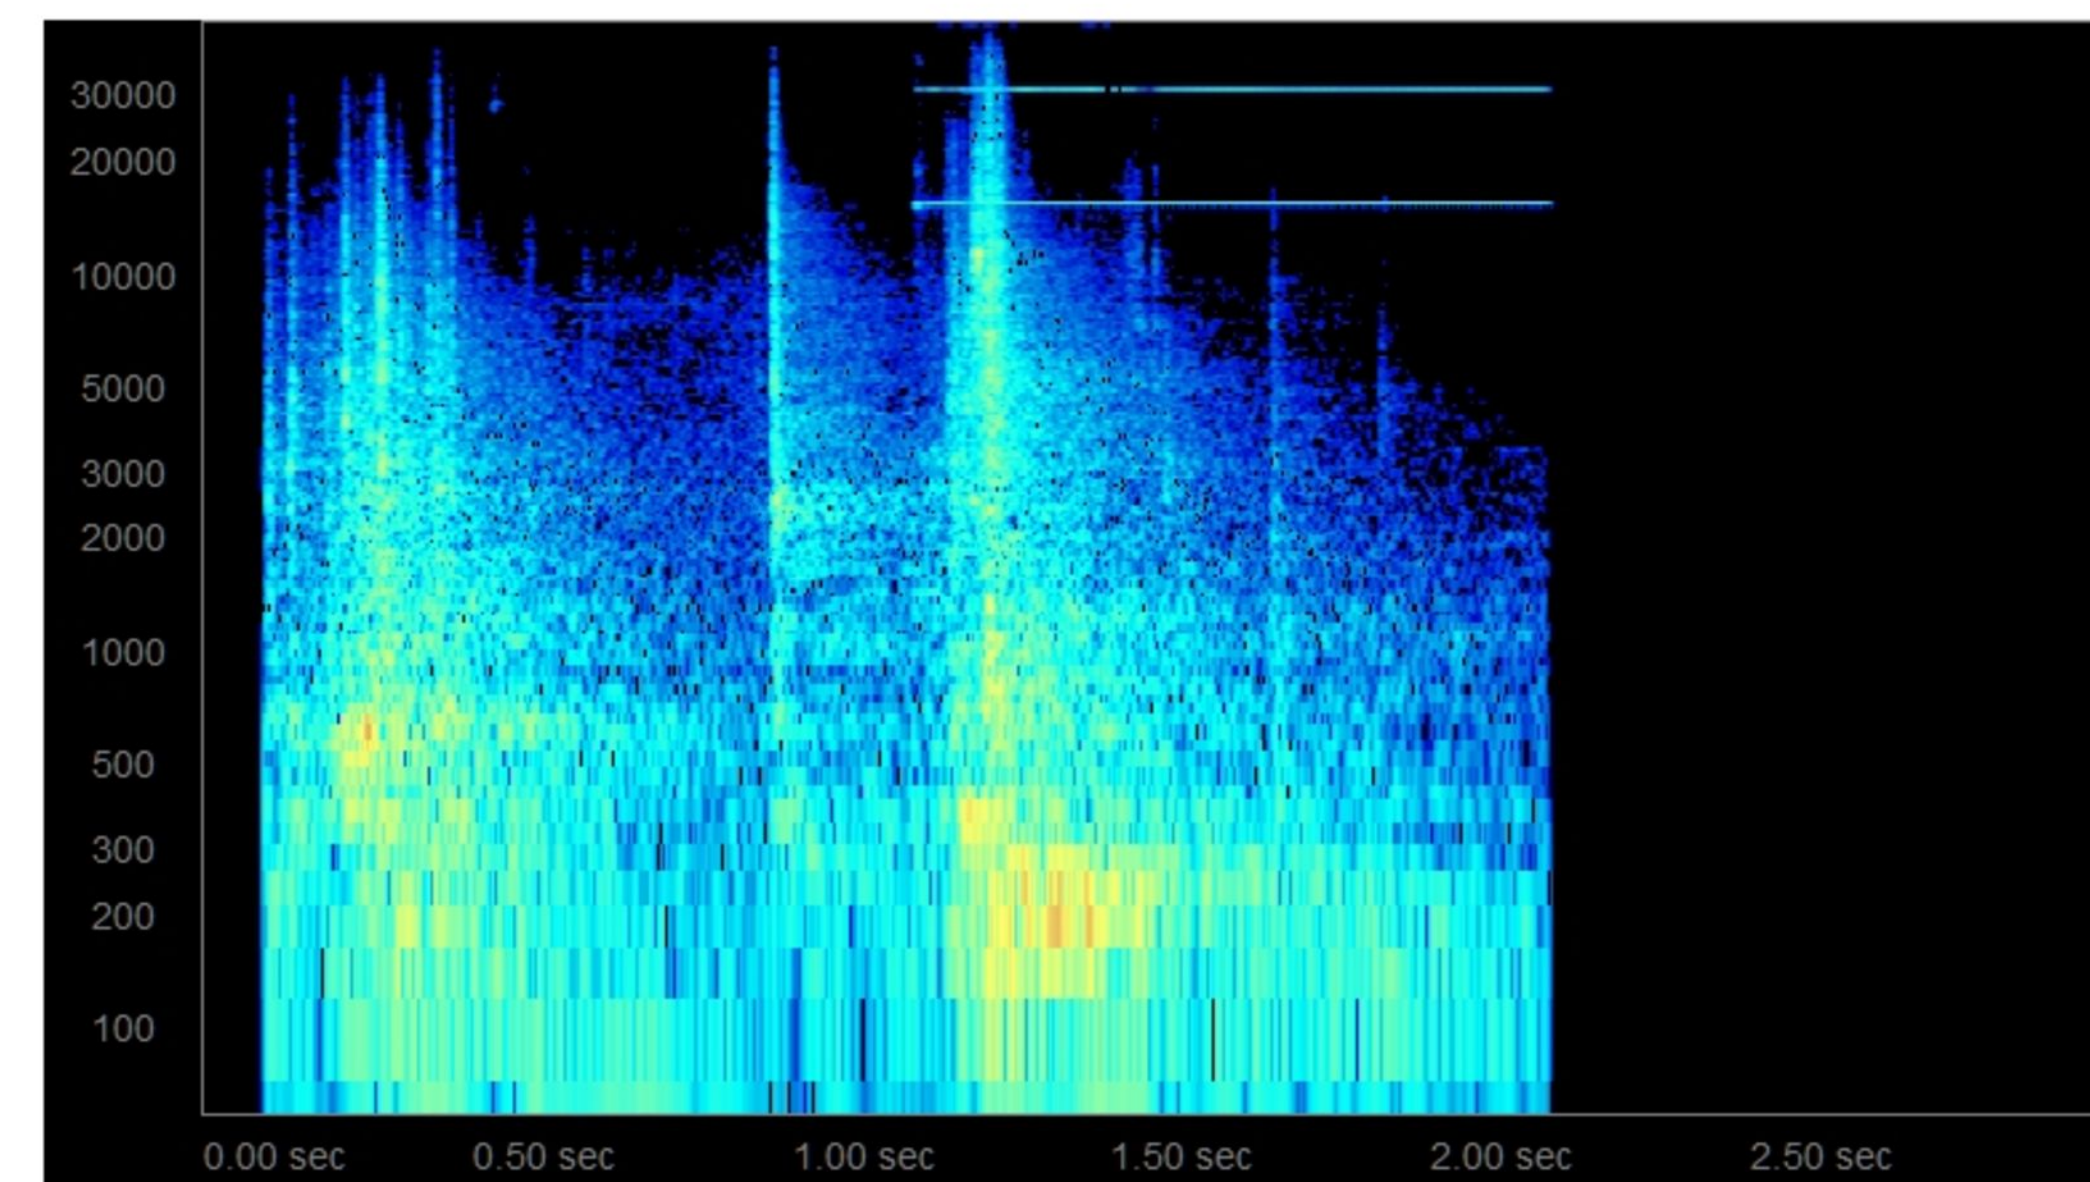

VCR and TV turning on

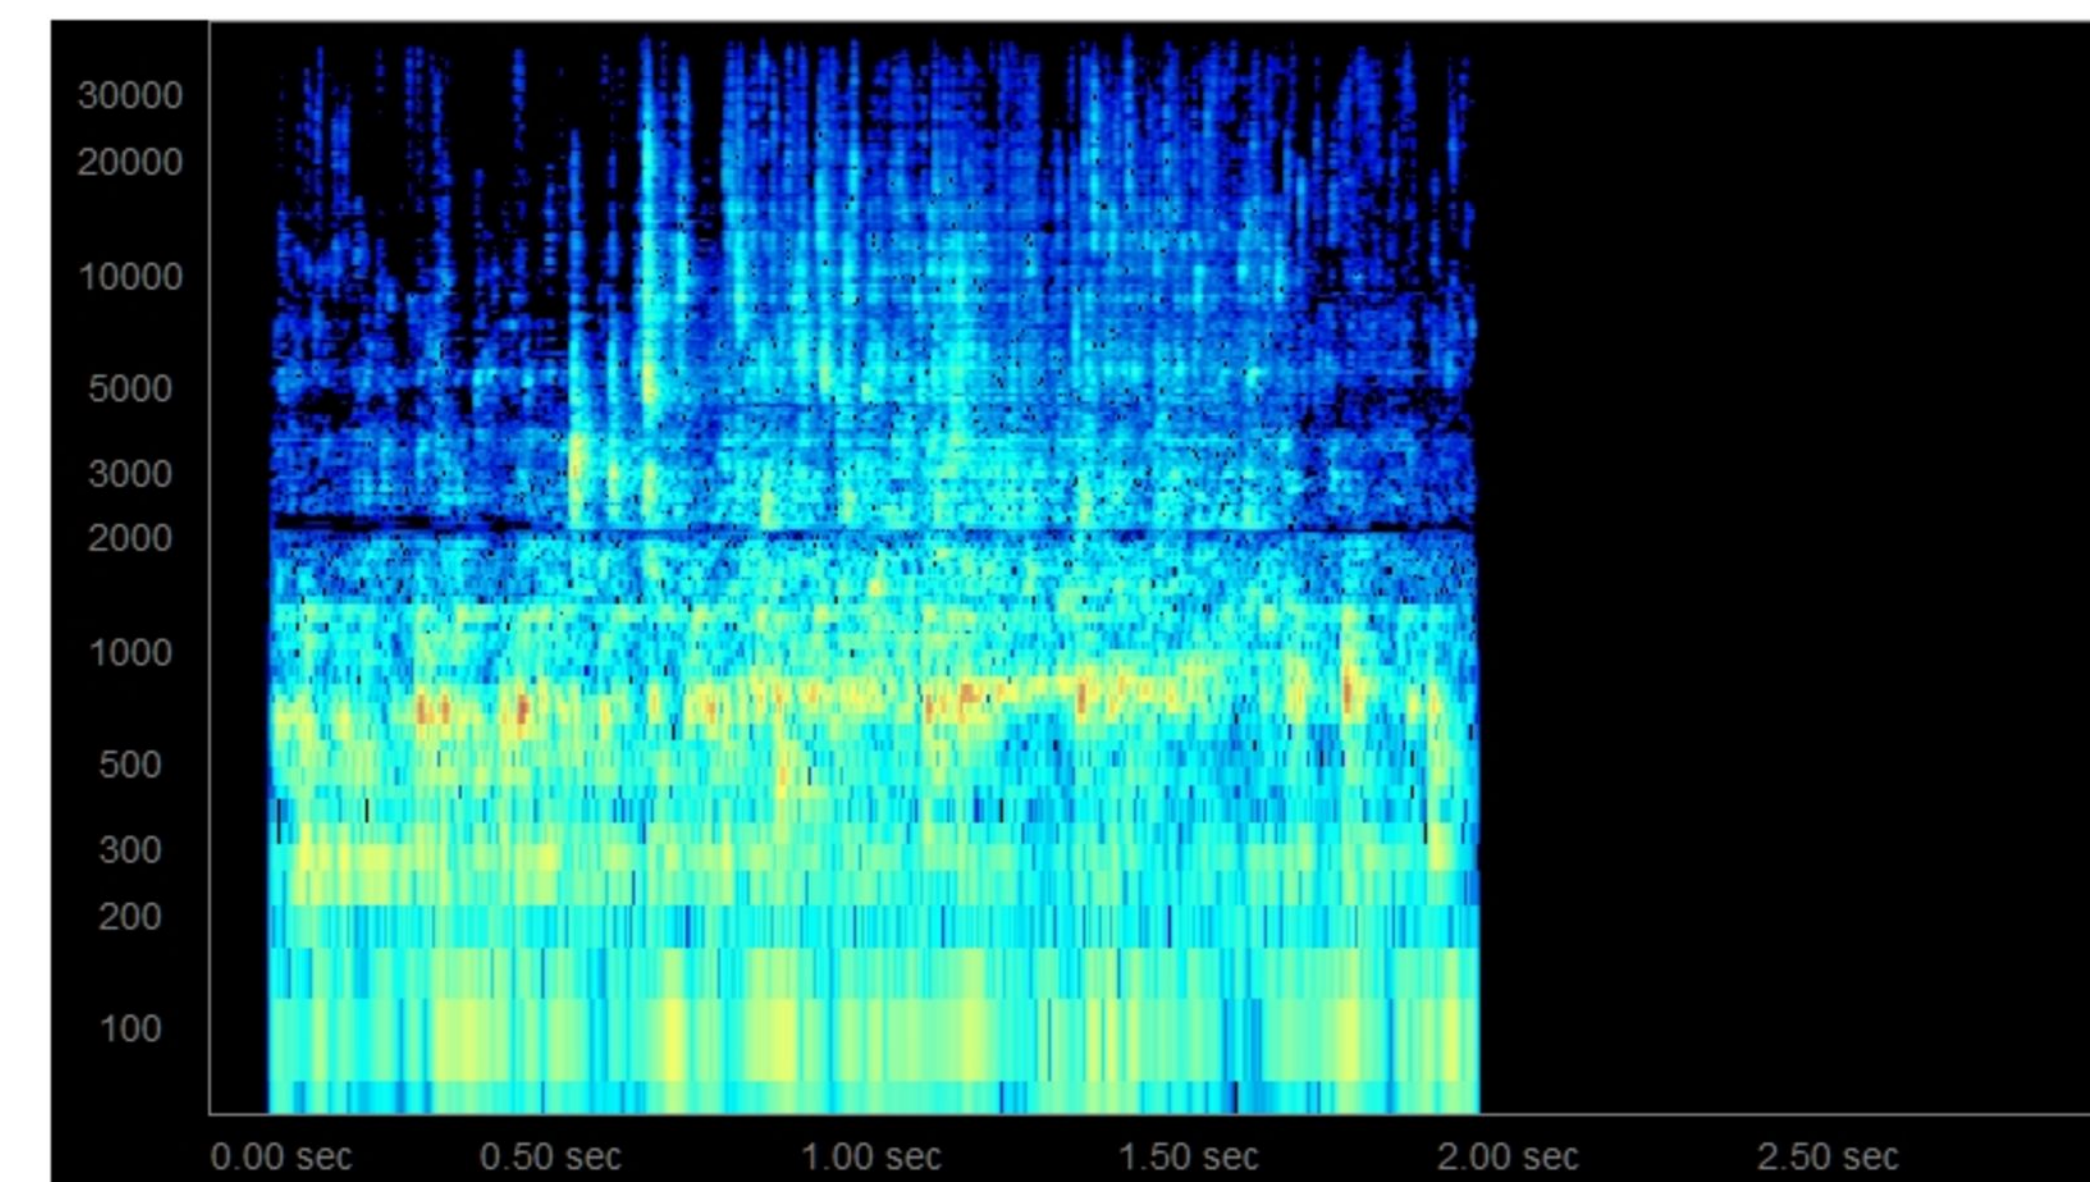

water running in sink

time [s]
