# Supplementary material
Source: PubMed Central journal article supplement (PMC2746772)
Supplement: 00167.2009_6.pdf [file 00167.2009_6.pdf]

1 Supplementary Figure 1. High-resolution spectrograms of monkey call (MC) stimuli. For  
2 presentation clarity, 100 ms of silence has been added prior to stimulus onset. Frequency  
3 scale is logarithmic.

4  
5 Supplementary Figure 2. High-resolution spectrograms of environmental sound (ES)  
6 stimuli. For presentation clarity, 100 ms of silence has been added prior to stimulus onset.  
7 Frequency scale is logarithmic.

8  
9 Supplementary Figure 3. *A*: distribution of BPN/PT ratio obtained from the neurons'  
10 onset responses [BPN/PT(o)] in the recording area. Data smoothed with a 2D Gaussian  
11 kernel,  $\sigma=1.5$ . Black line shows the core/belt boundary. *B*: direction, strength, and  
12 significance of BPN/PT(o) gradients. Correlation coefficient of the ratio values with  
13 spatial locations of units projected onto an axis which was rotated 360 degrees in 5-  
14 degree steps is shown as a black line. The gradient direction angle is the angle at which  
15 maximum correlation was found, the strength is the maximum  $r$  value, and the  $p$  value is  
16 determined by comparison with correlations obtained from scrambled data (shades of  
17 grey). See Methods for details. The outer circle of the plot denotes  $r=0.4$ . Cf. Figures 2  
18 and 3.

19  
20 Supplementary Figure 4. Selectivity to pure tones and band-pass noise bursts. The graphs  
21 show the preference index (PI, top row), t-test-based preference index ( $PI_t$ , middle row)  
22 and linear discriminator performance (LDPC, bottom right) for different cortical fields  
23 (color-coded) and stimulus classes (PT, pure tones; BPN13, 1/3-octave band-pass noise  
24 bursts; BPN1, 1-octave band-pass noise bursts). Vertical axes for PI and  $PI_t$  run from top  
25 to bottom, thus, on each graph taller bars indicate higher selectivity. PI and  $PI_t$  are  
26 analyzed separately for “on” (left), “sustained” (middle), and “entire” (right) response.  
27 Significant differences between stimulus classes and across-class differences between  
28 fields (or groups or fields, such as core, belt, more anterior, more posterior fields) are  
29 marked *above* graphs. Within-class differences are marked *below* the class' groups of  
30 bars. Differences between classes within a field or group of fields are marked with lines.

31 Grey line in the PI/”sustained” graph was used to denote an almost significant difference.

32 Error bars show standard deviations.

33

34 Supplementary Figure 5. Selectivity to monkey calls (MC) and environmental sounds

35 (ES). See Supplementary Figure 4 for a detailed legend.

36
