# Supplementary material
Source: PubMed Central journal article supplement (PMC2746772)

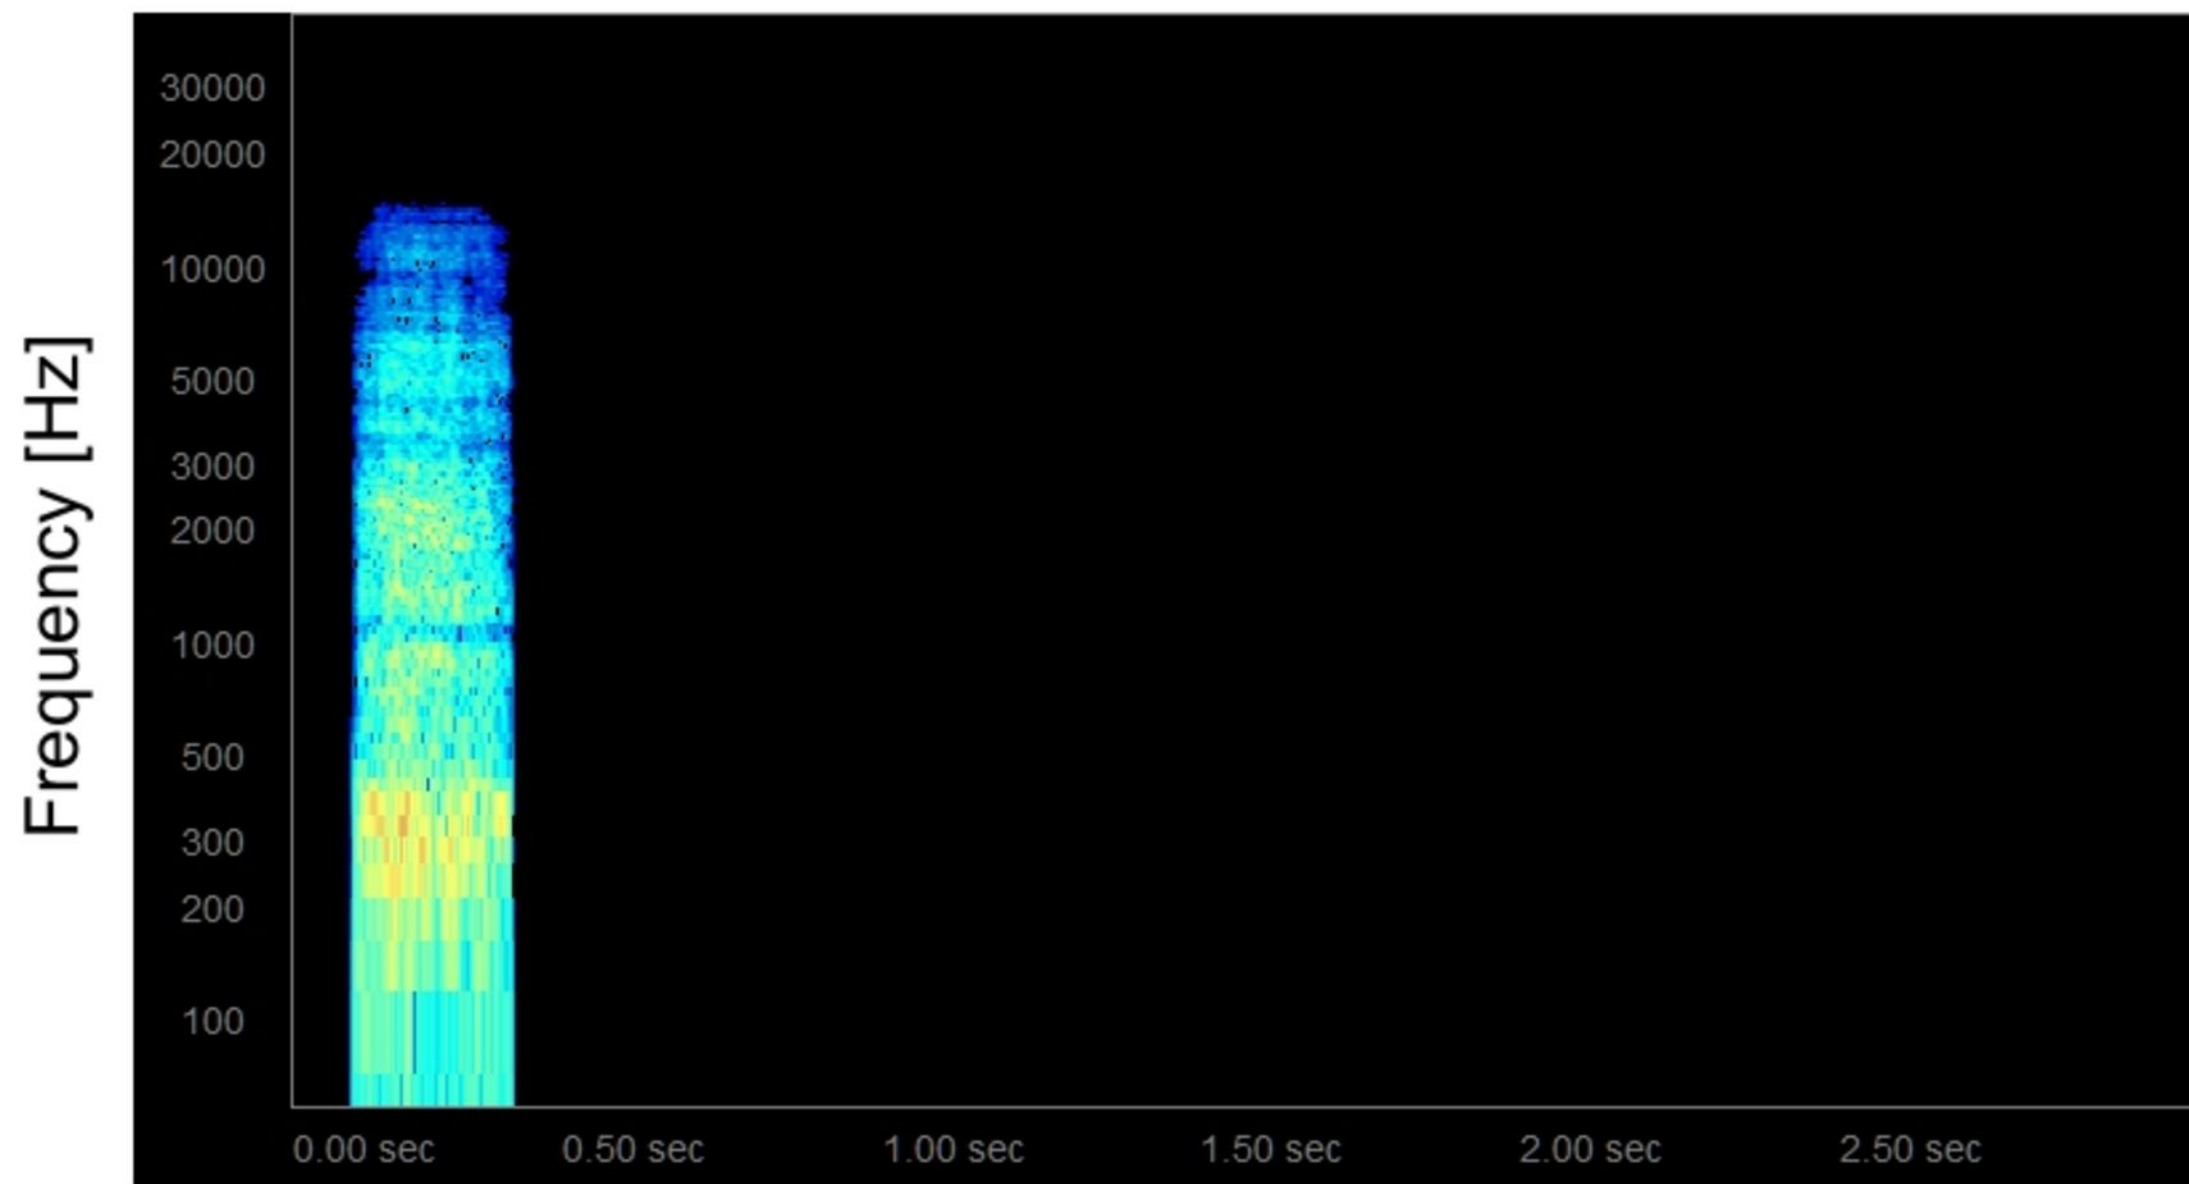

Bark

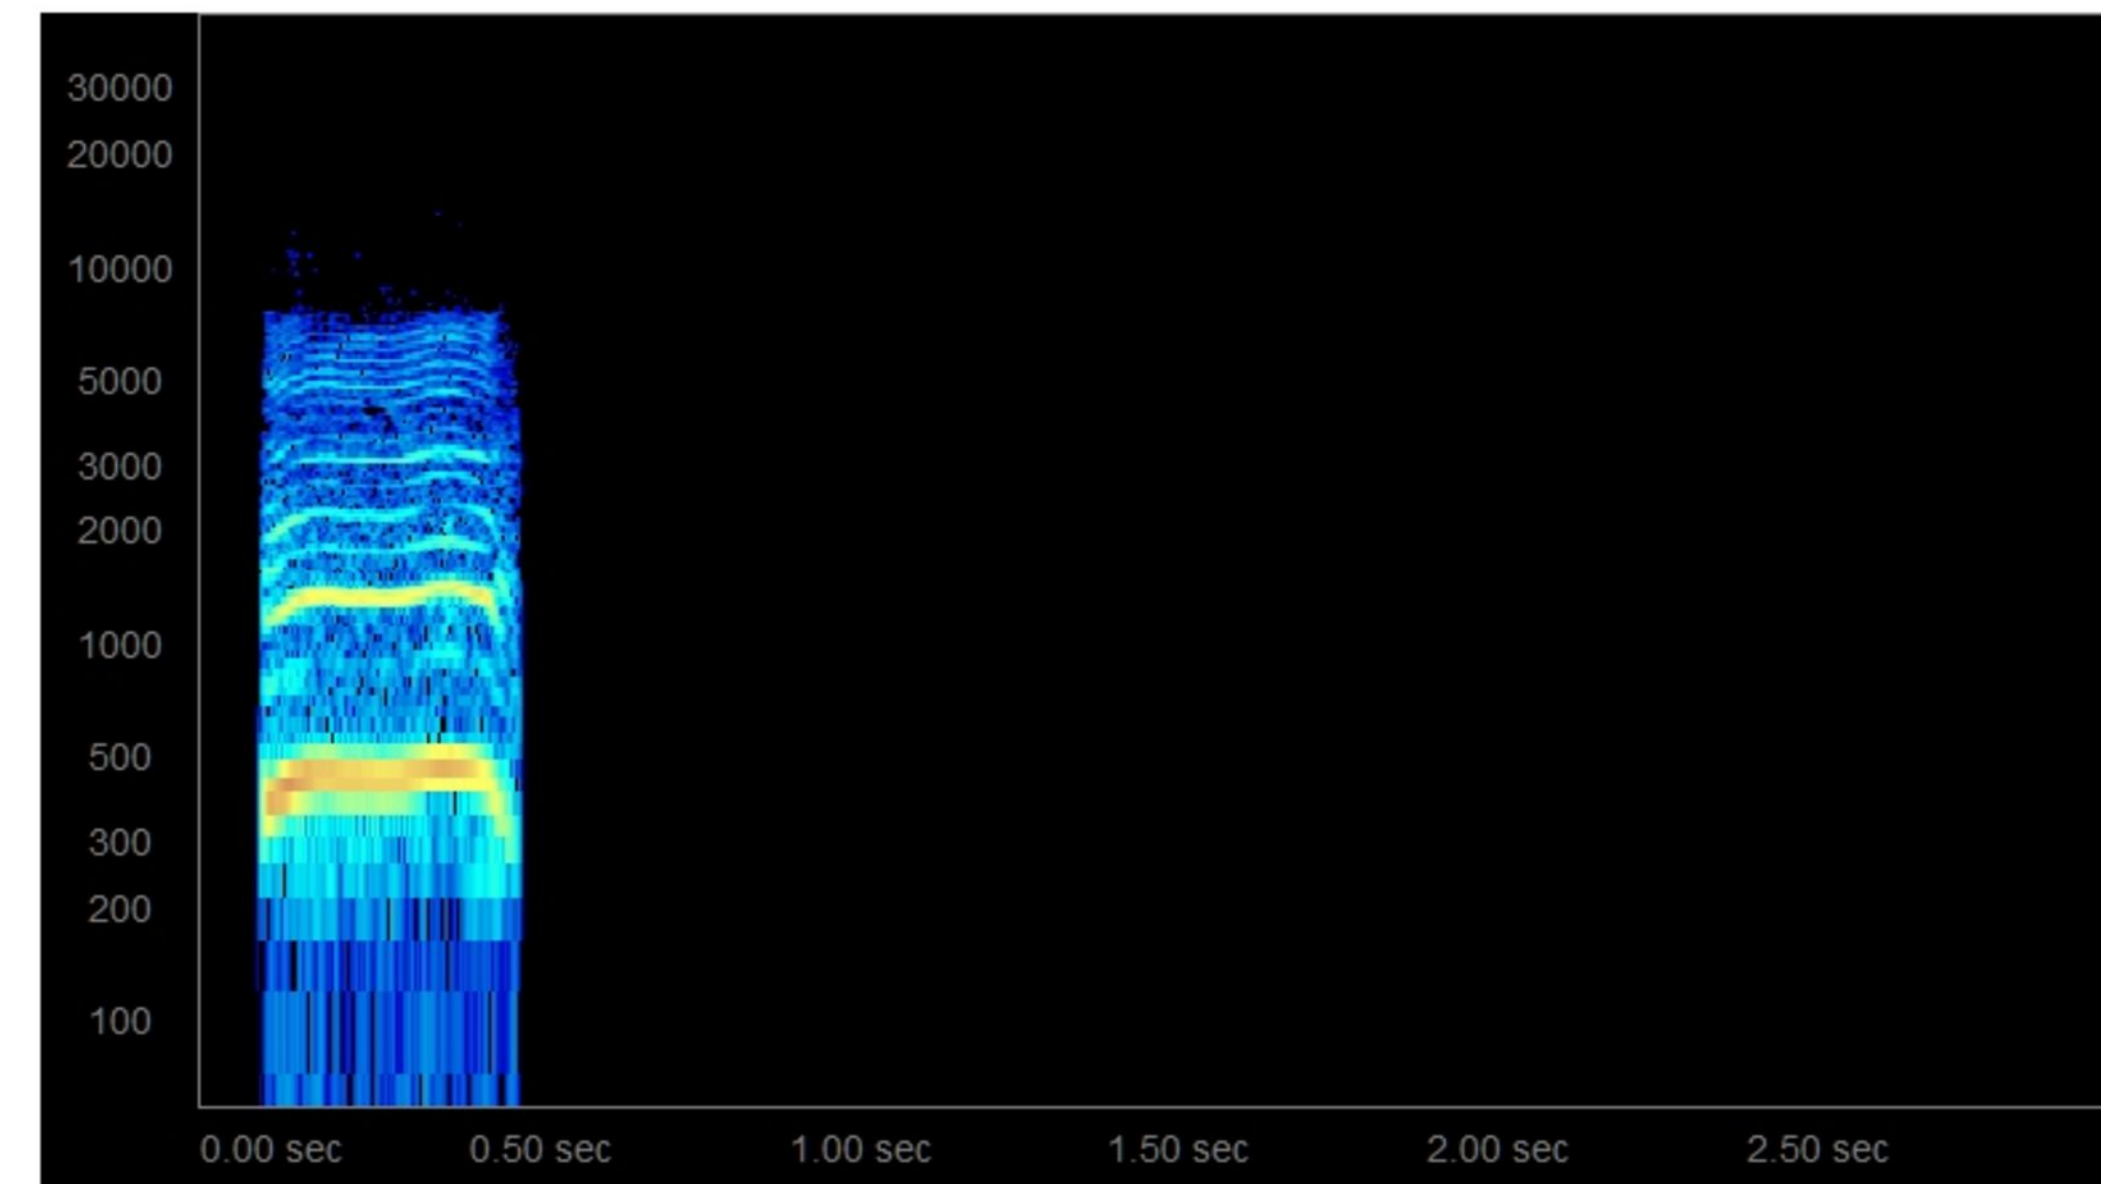

Coo 1

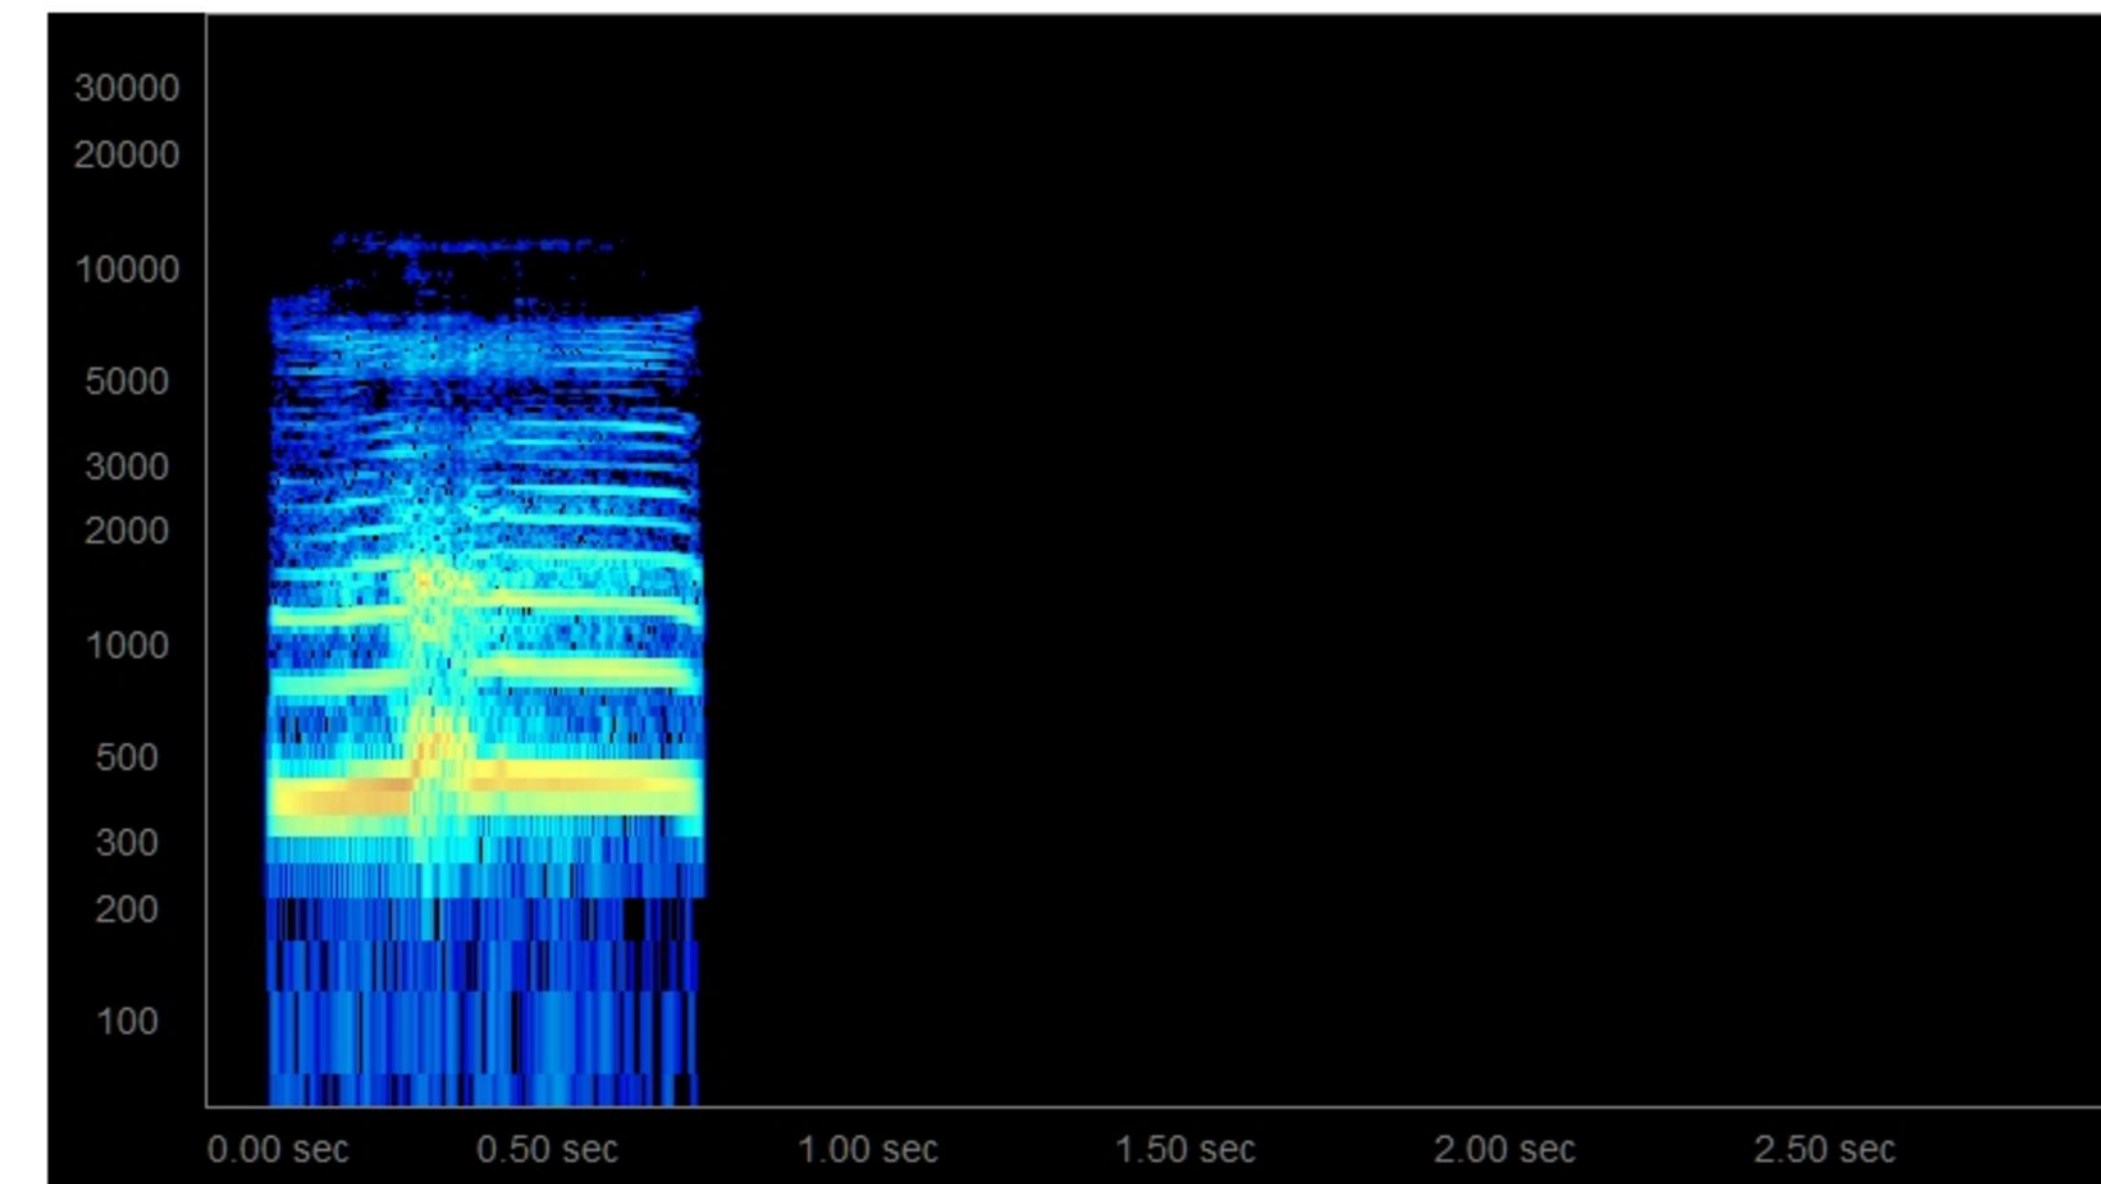

Coo 2

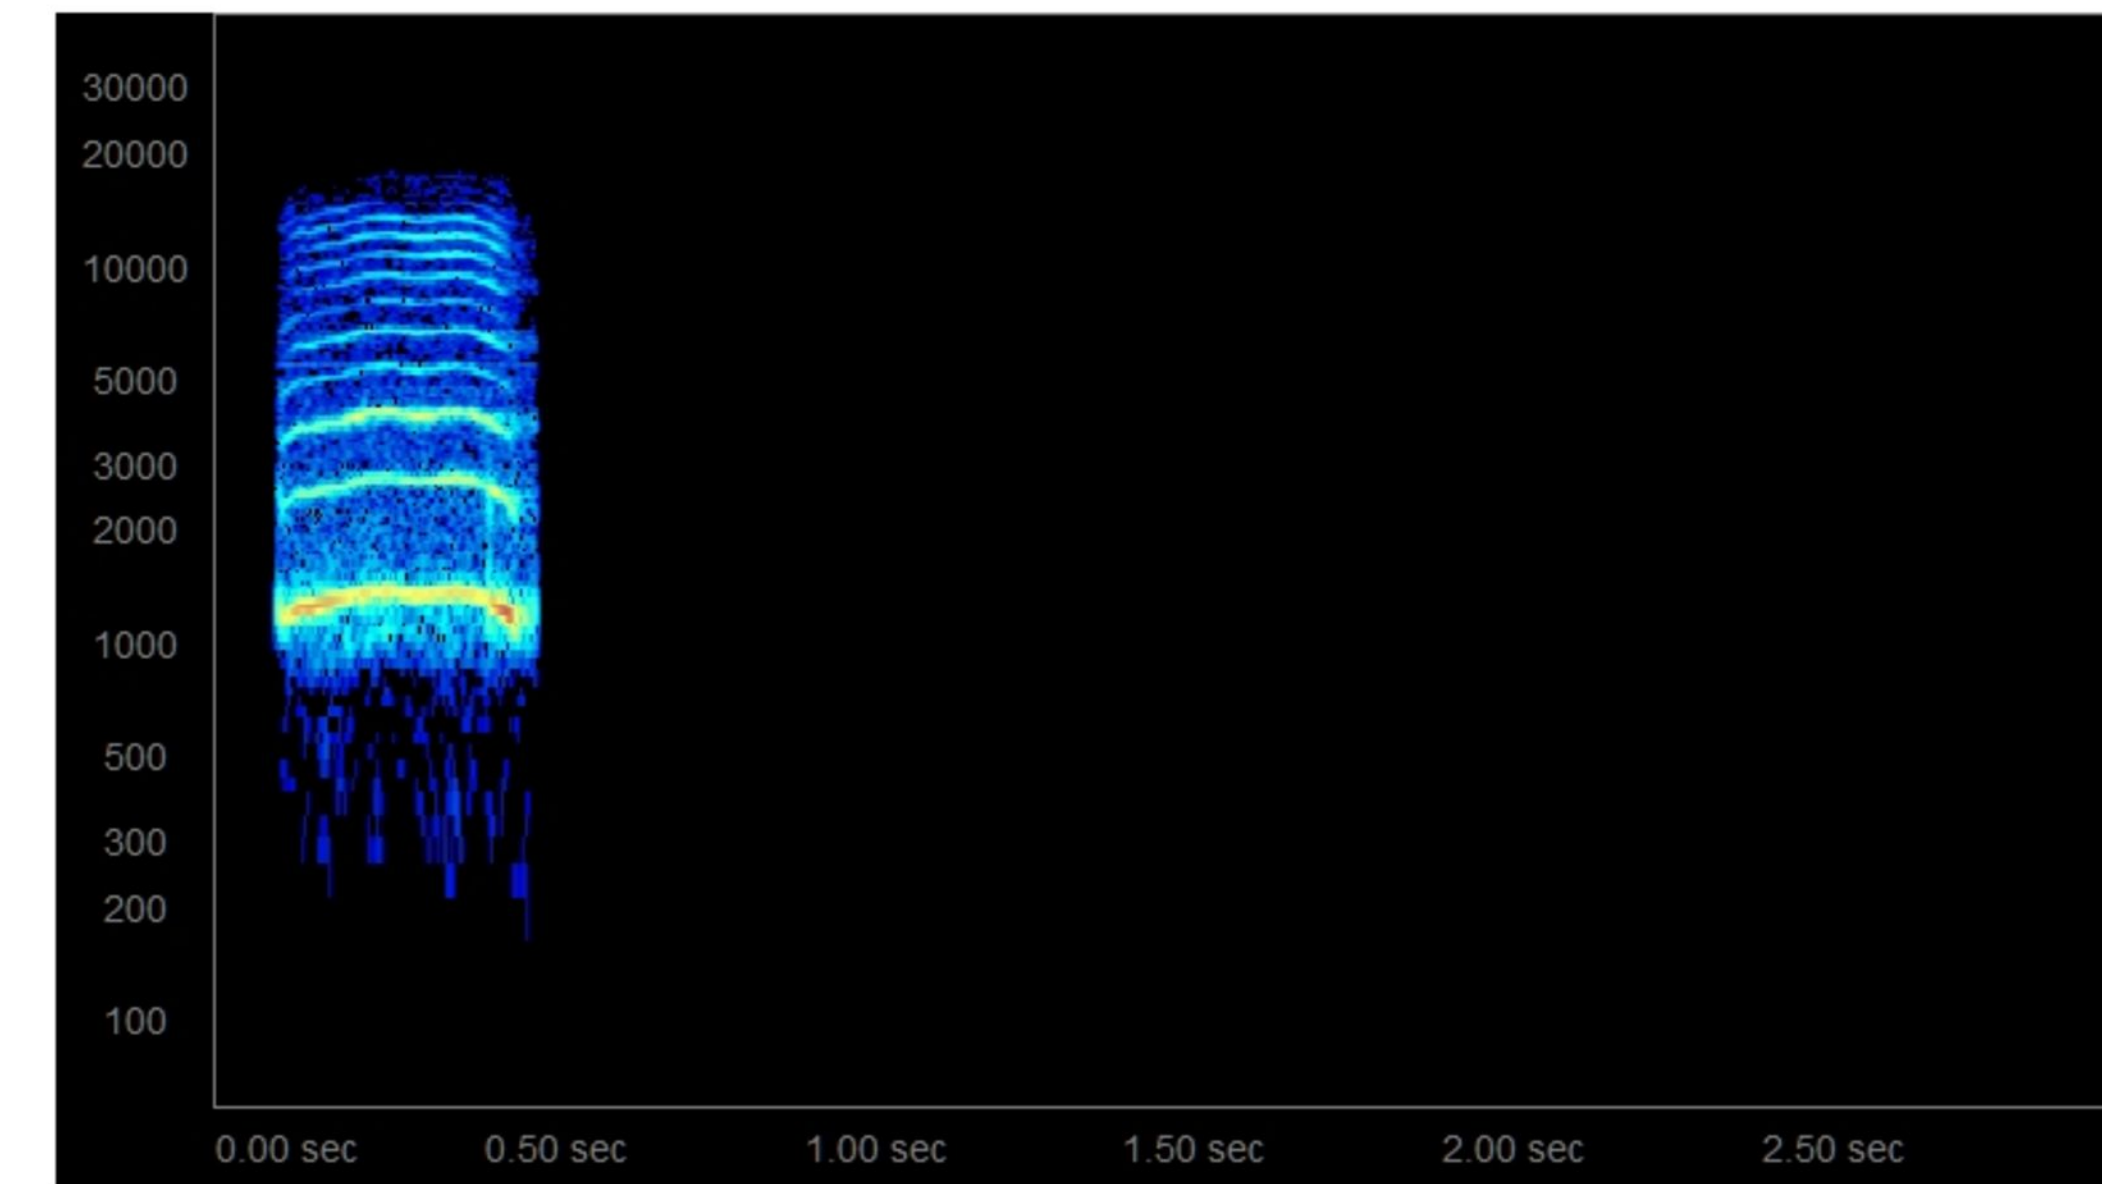

Coo 3

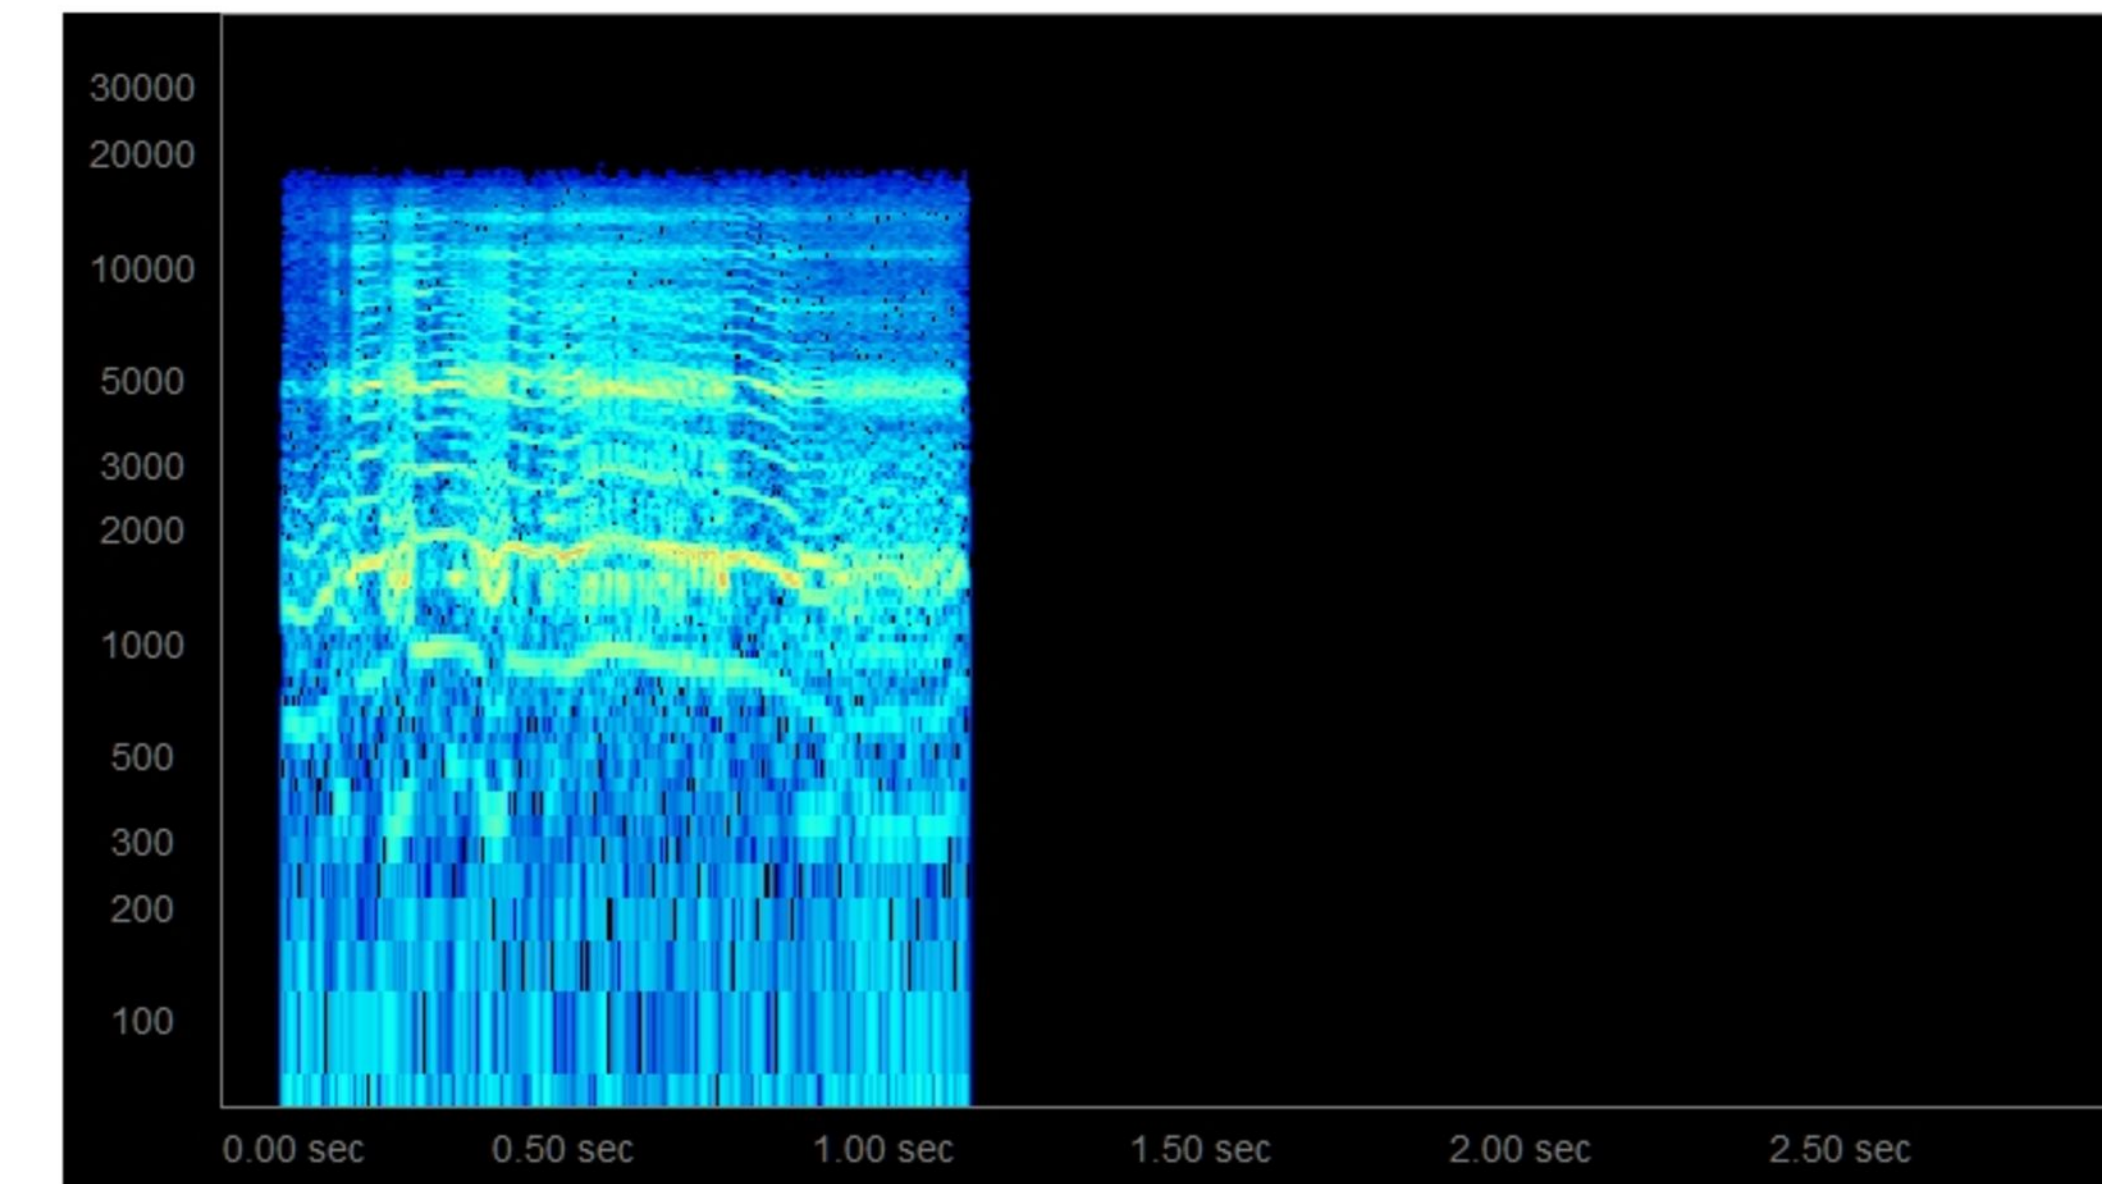

Girney

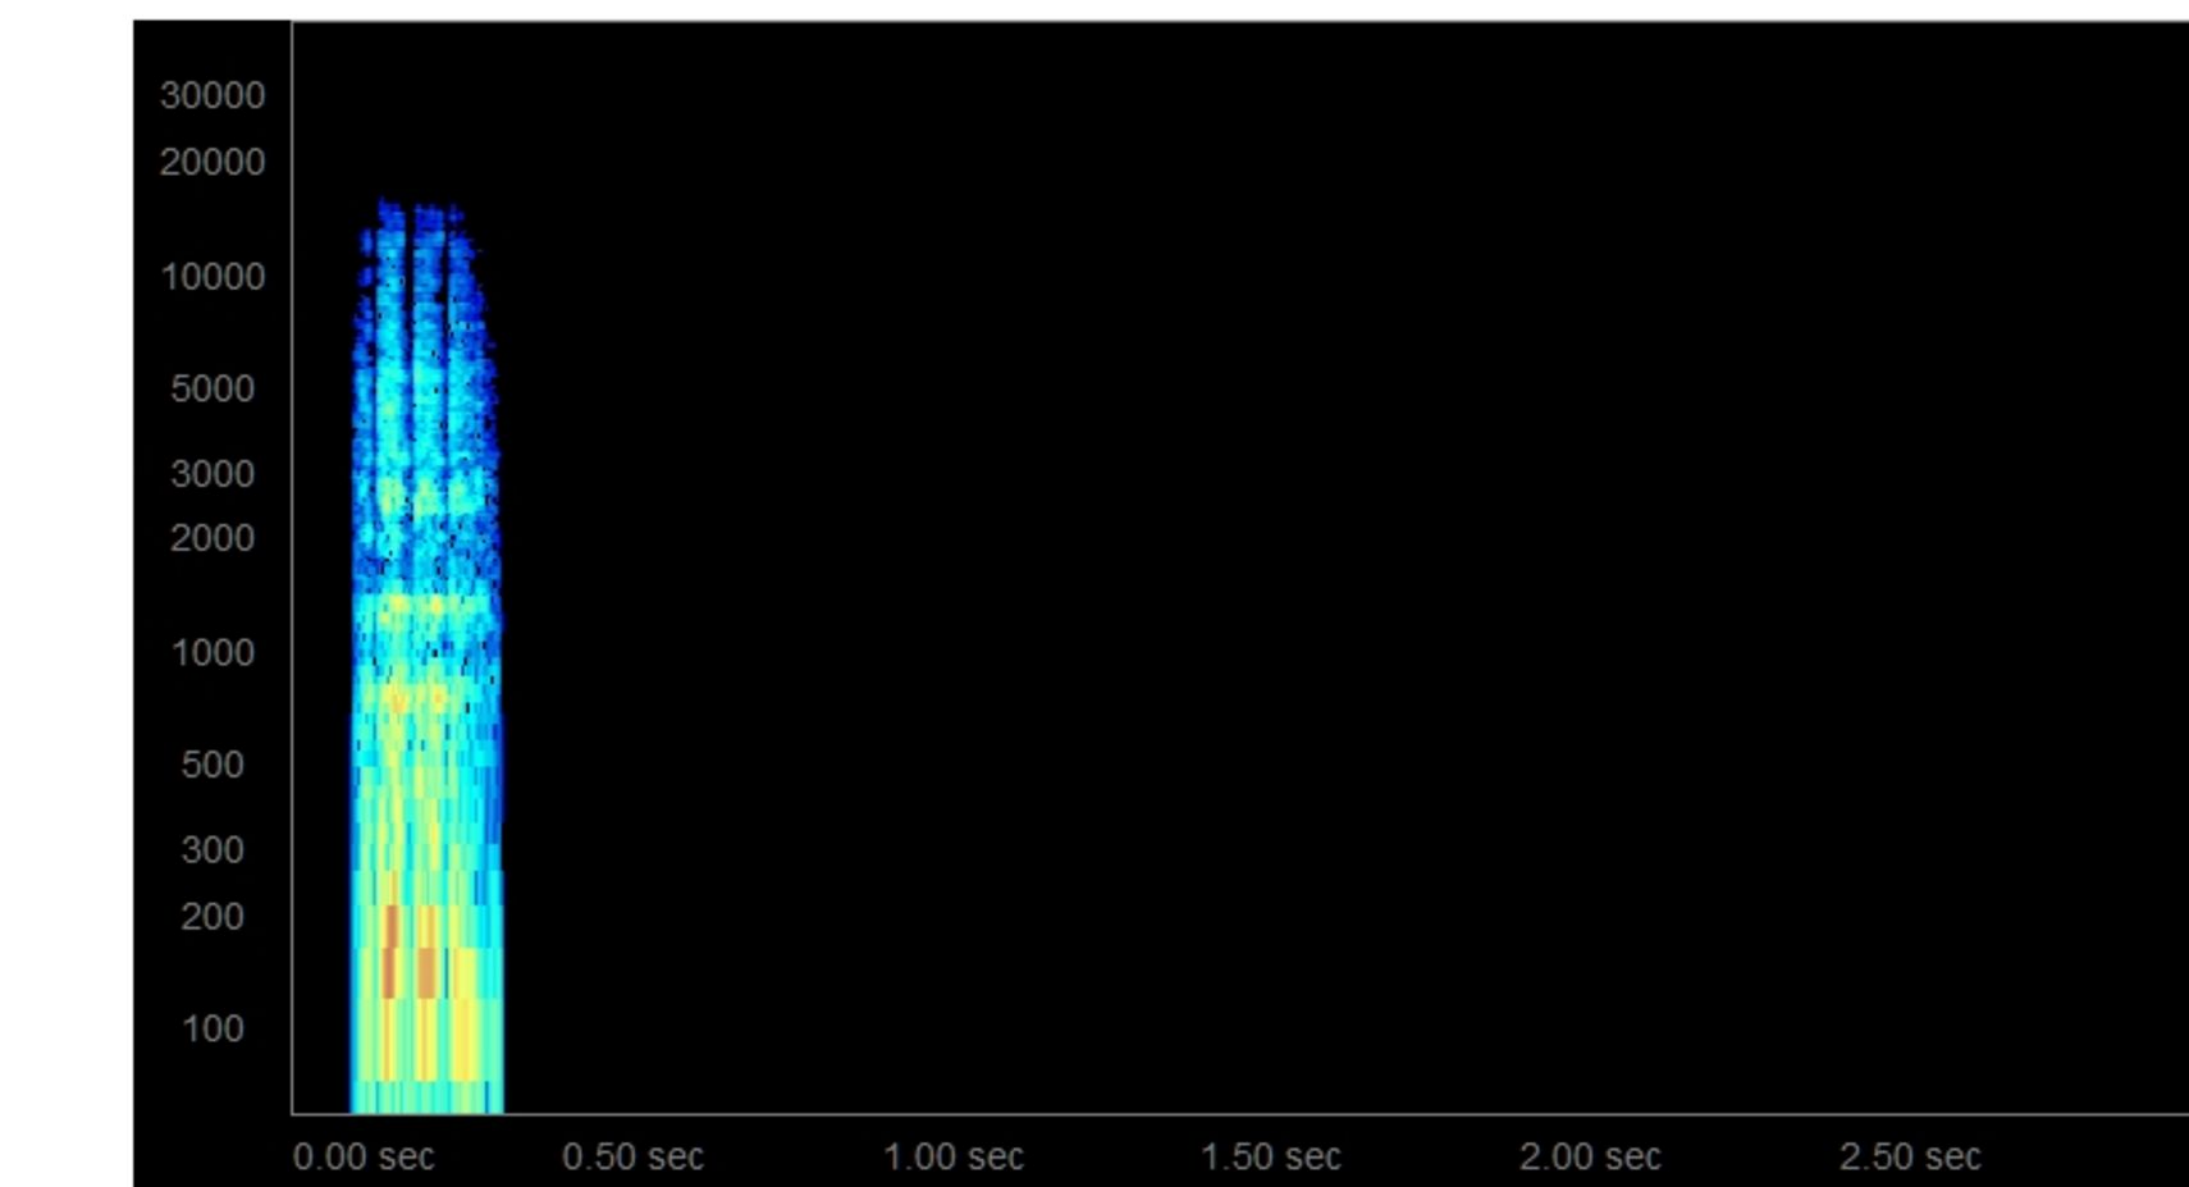

Grunt

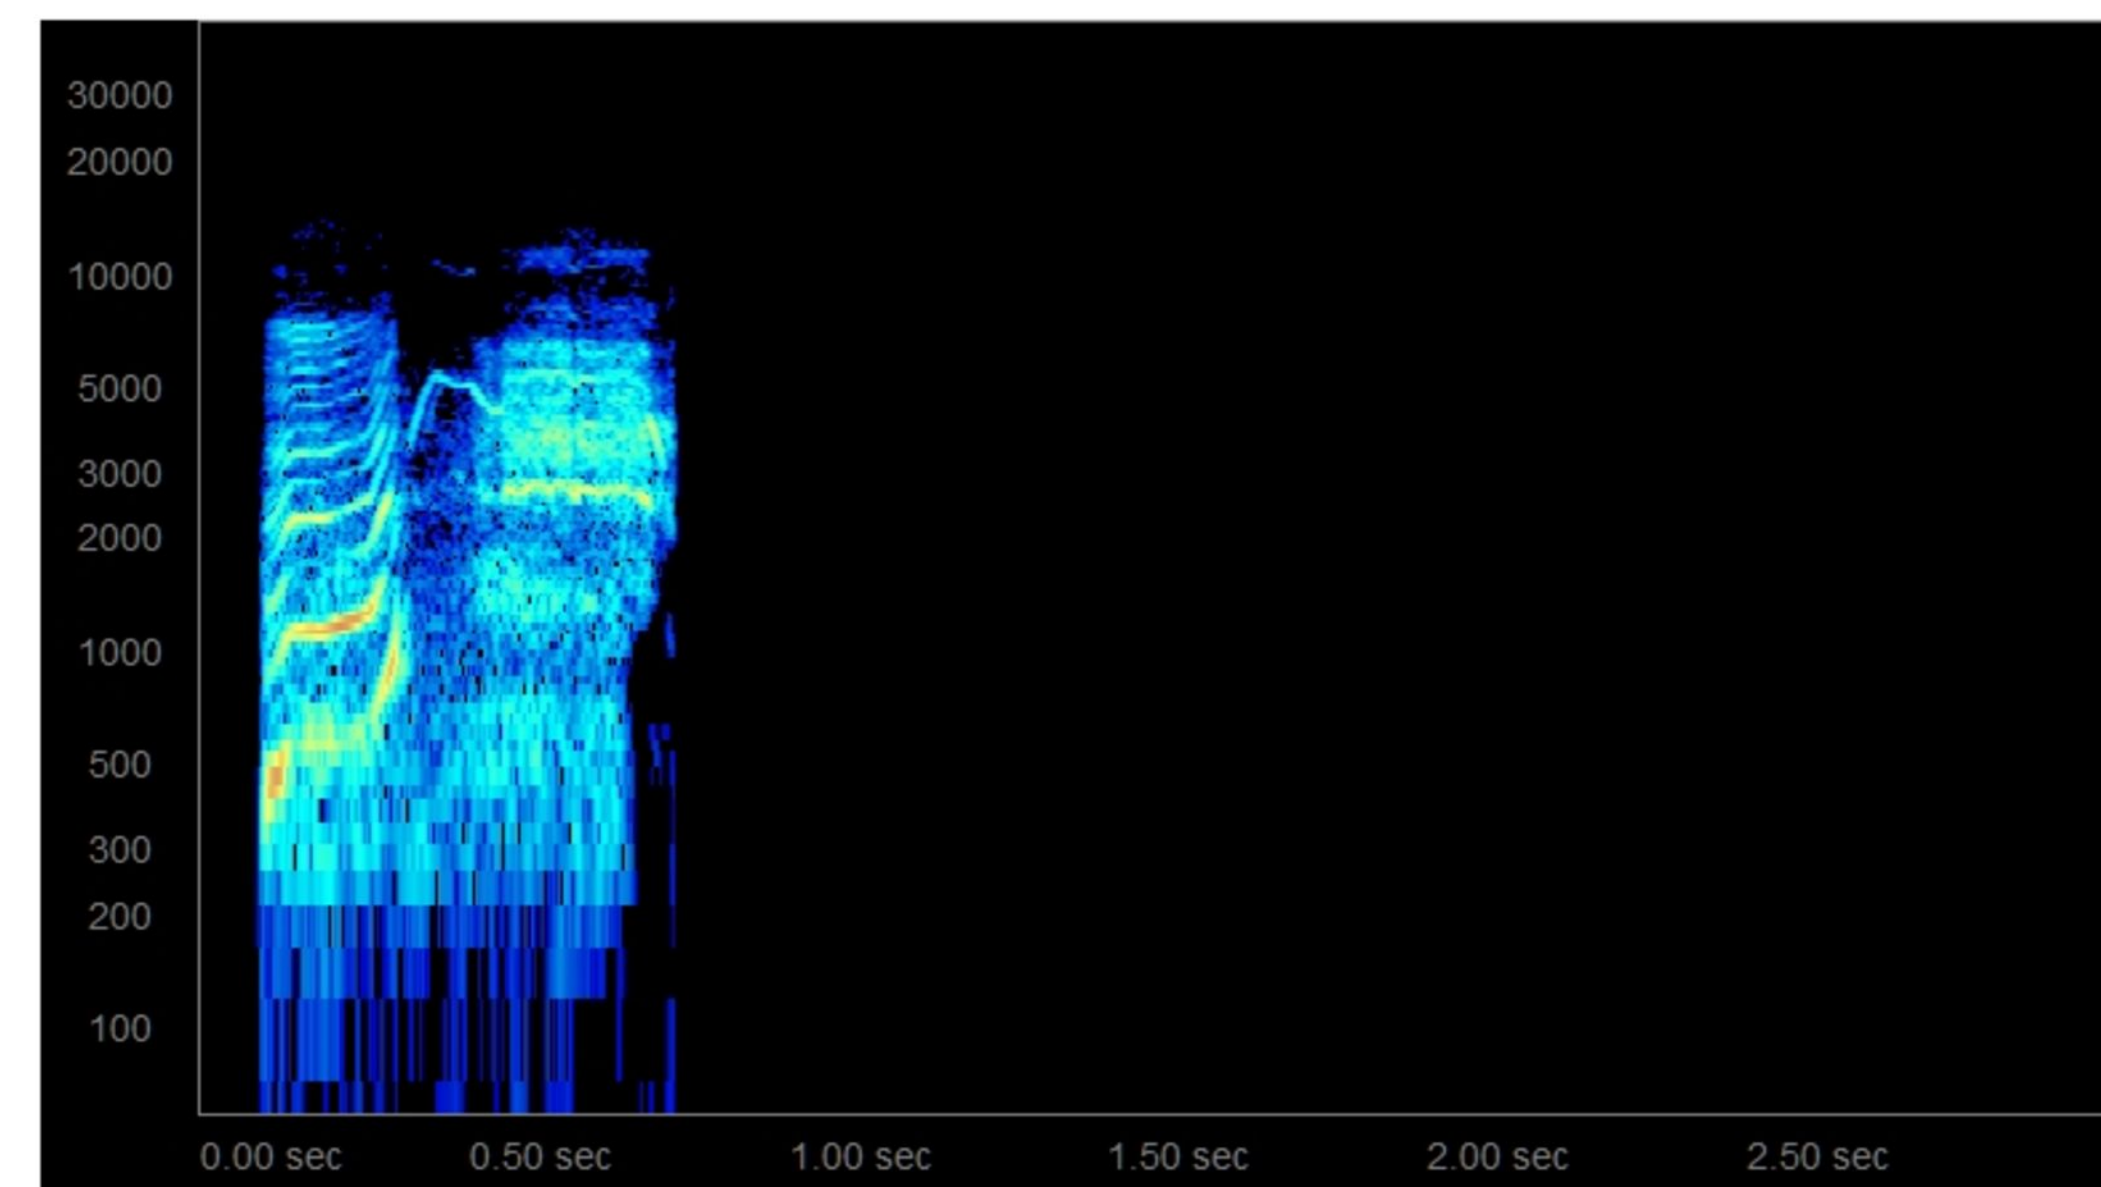

Harmonic arch

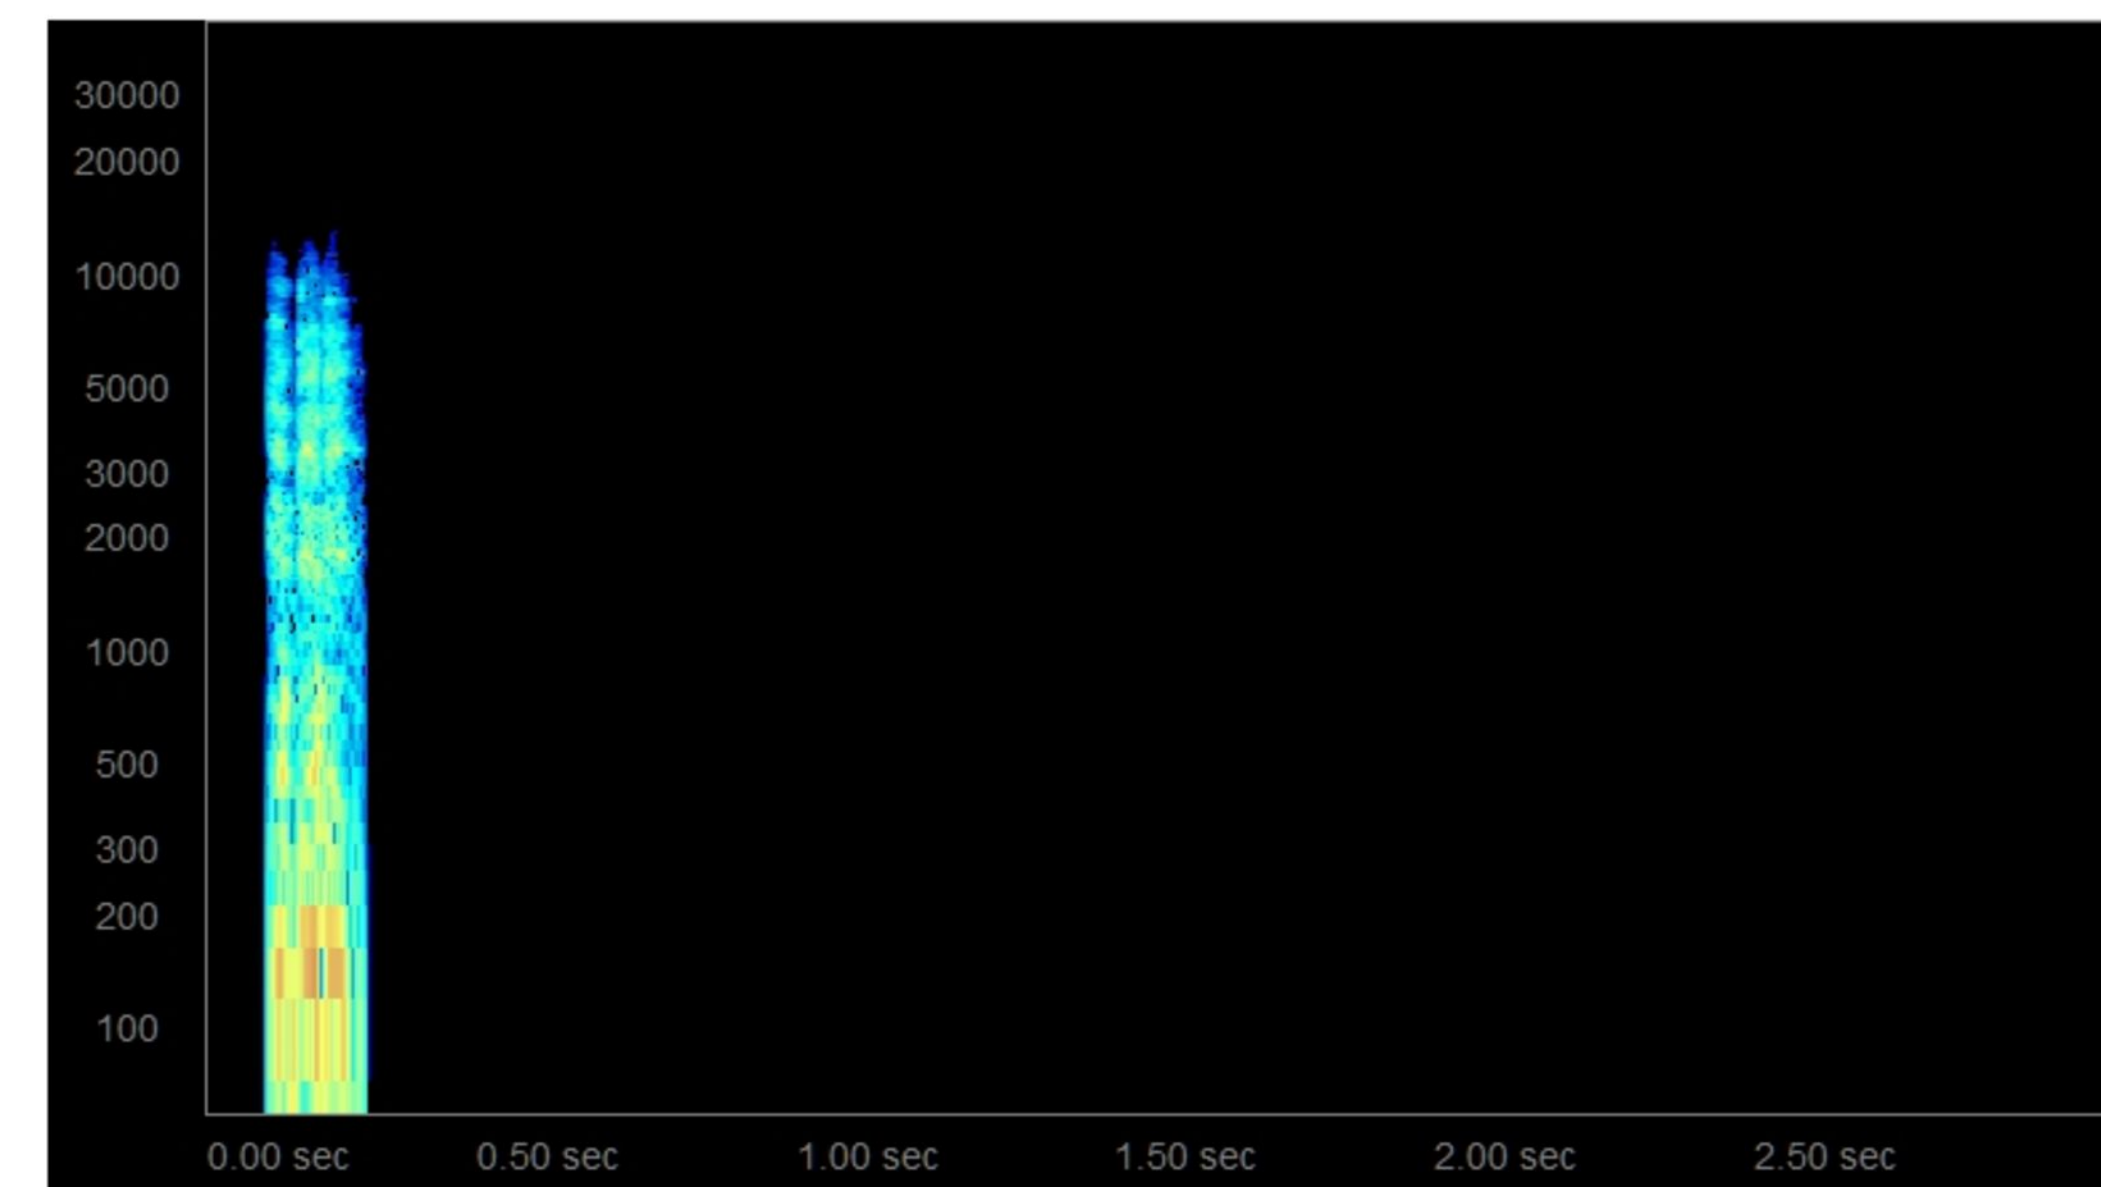

Pant threat

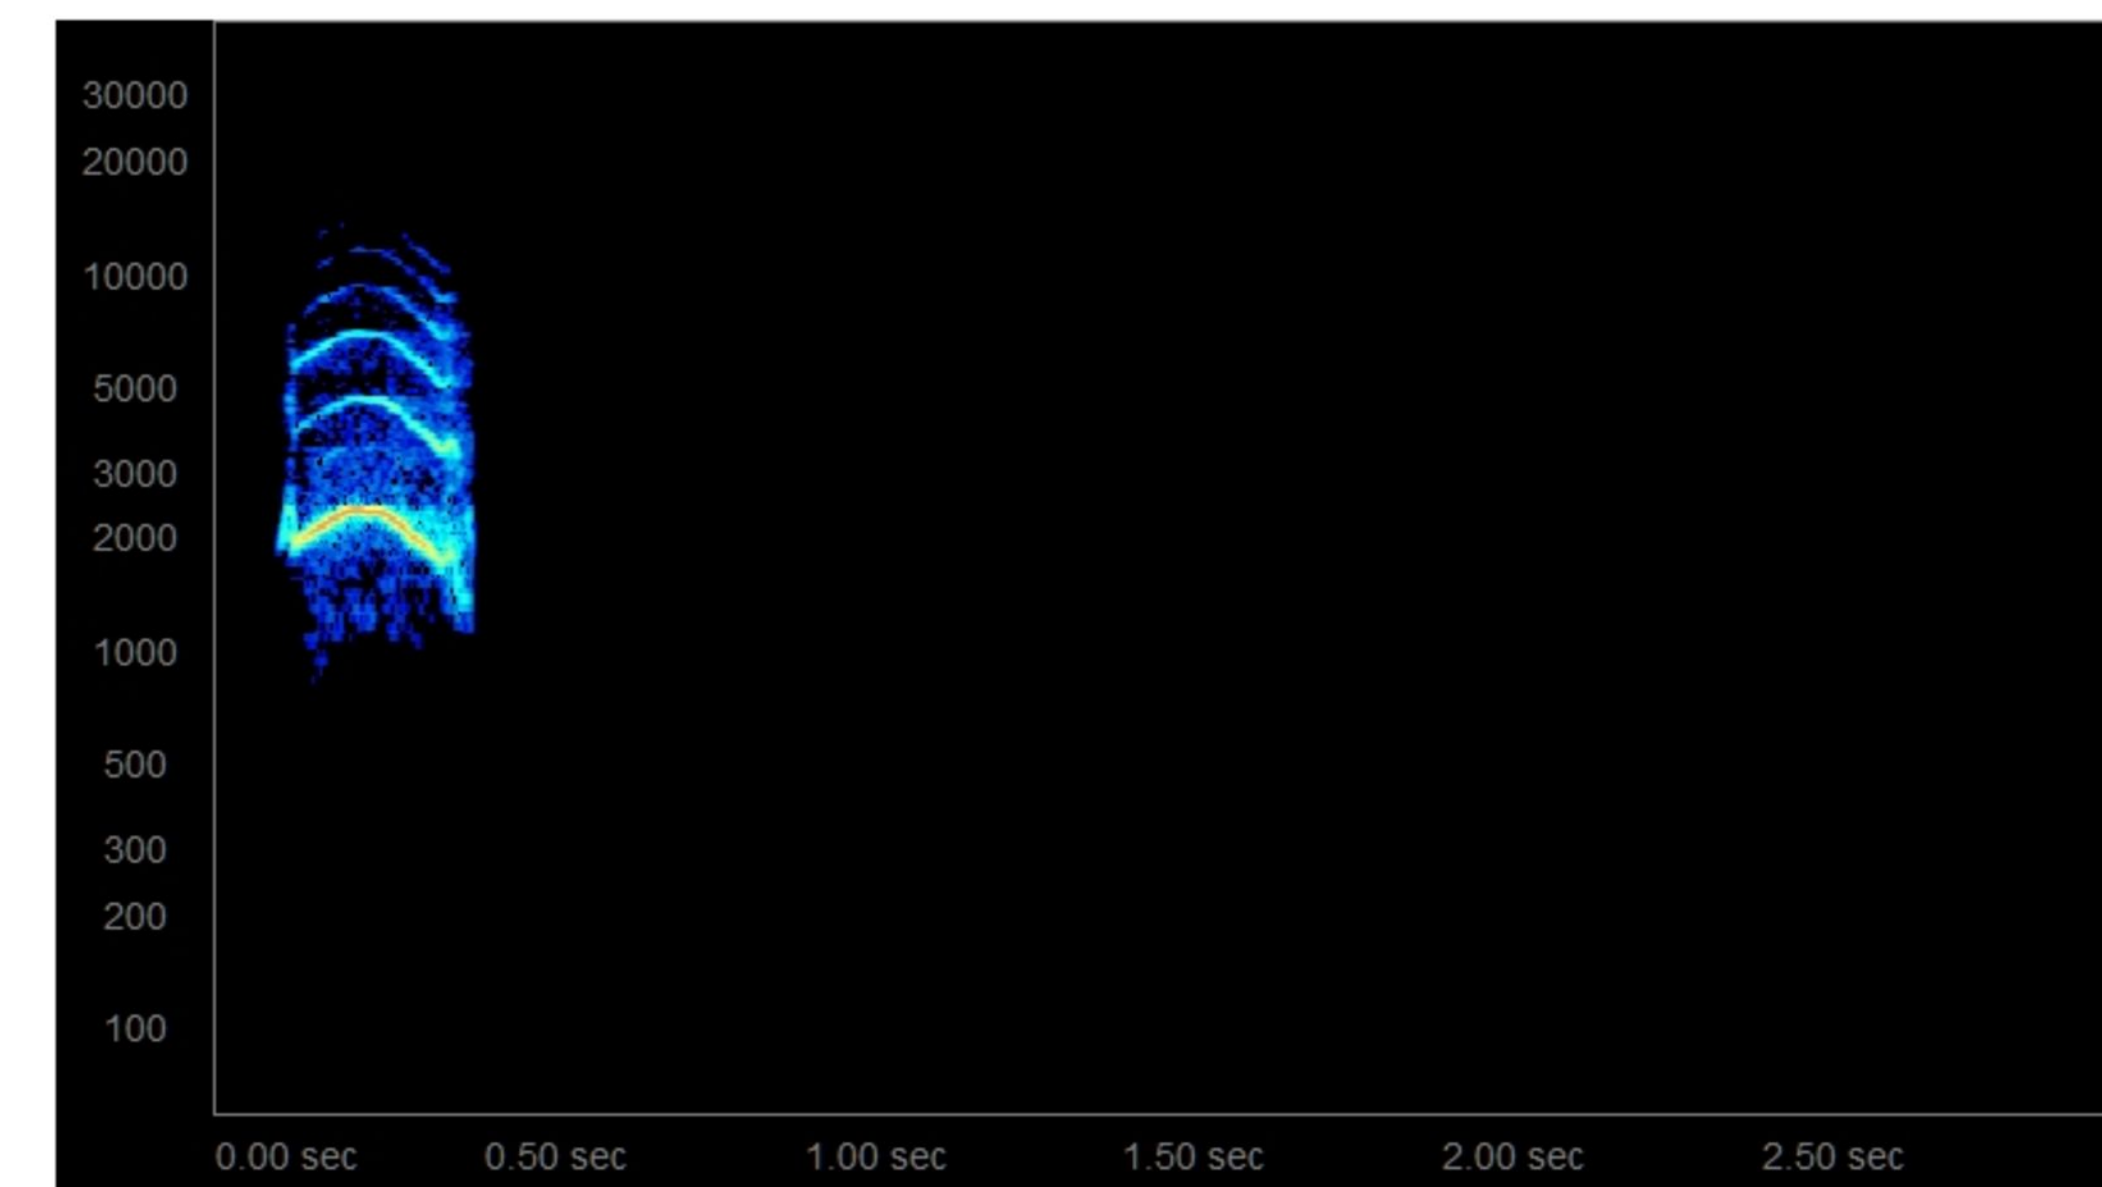

Scream 1

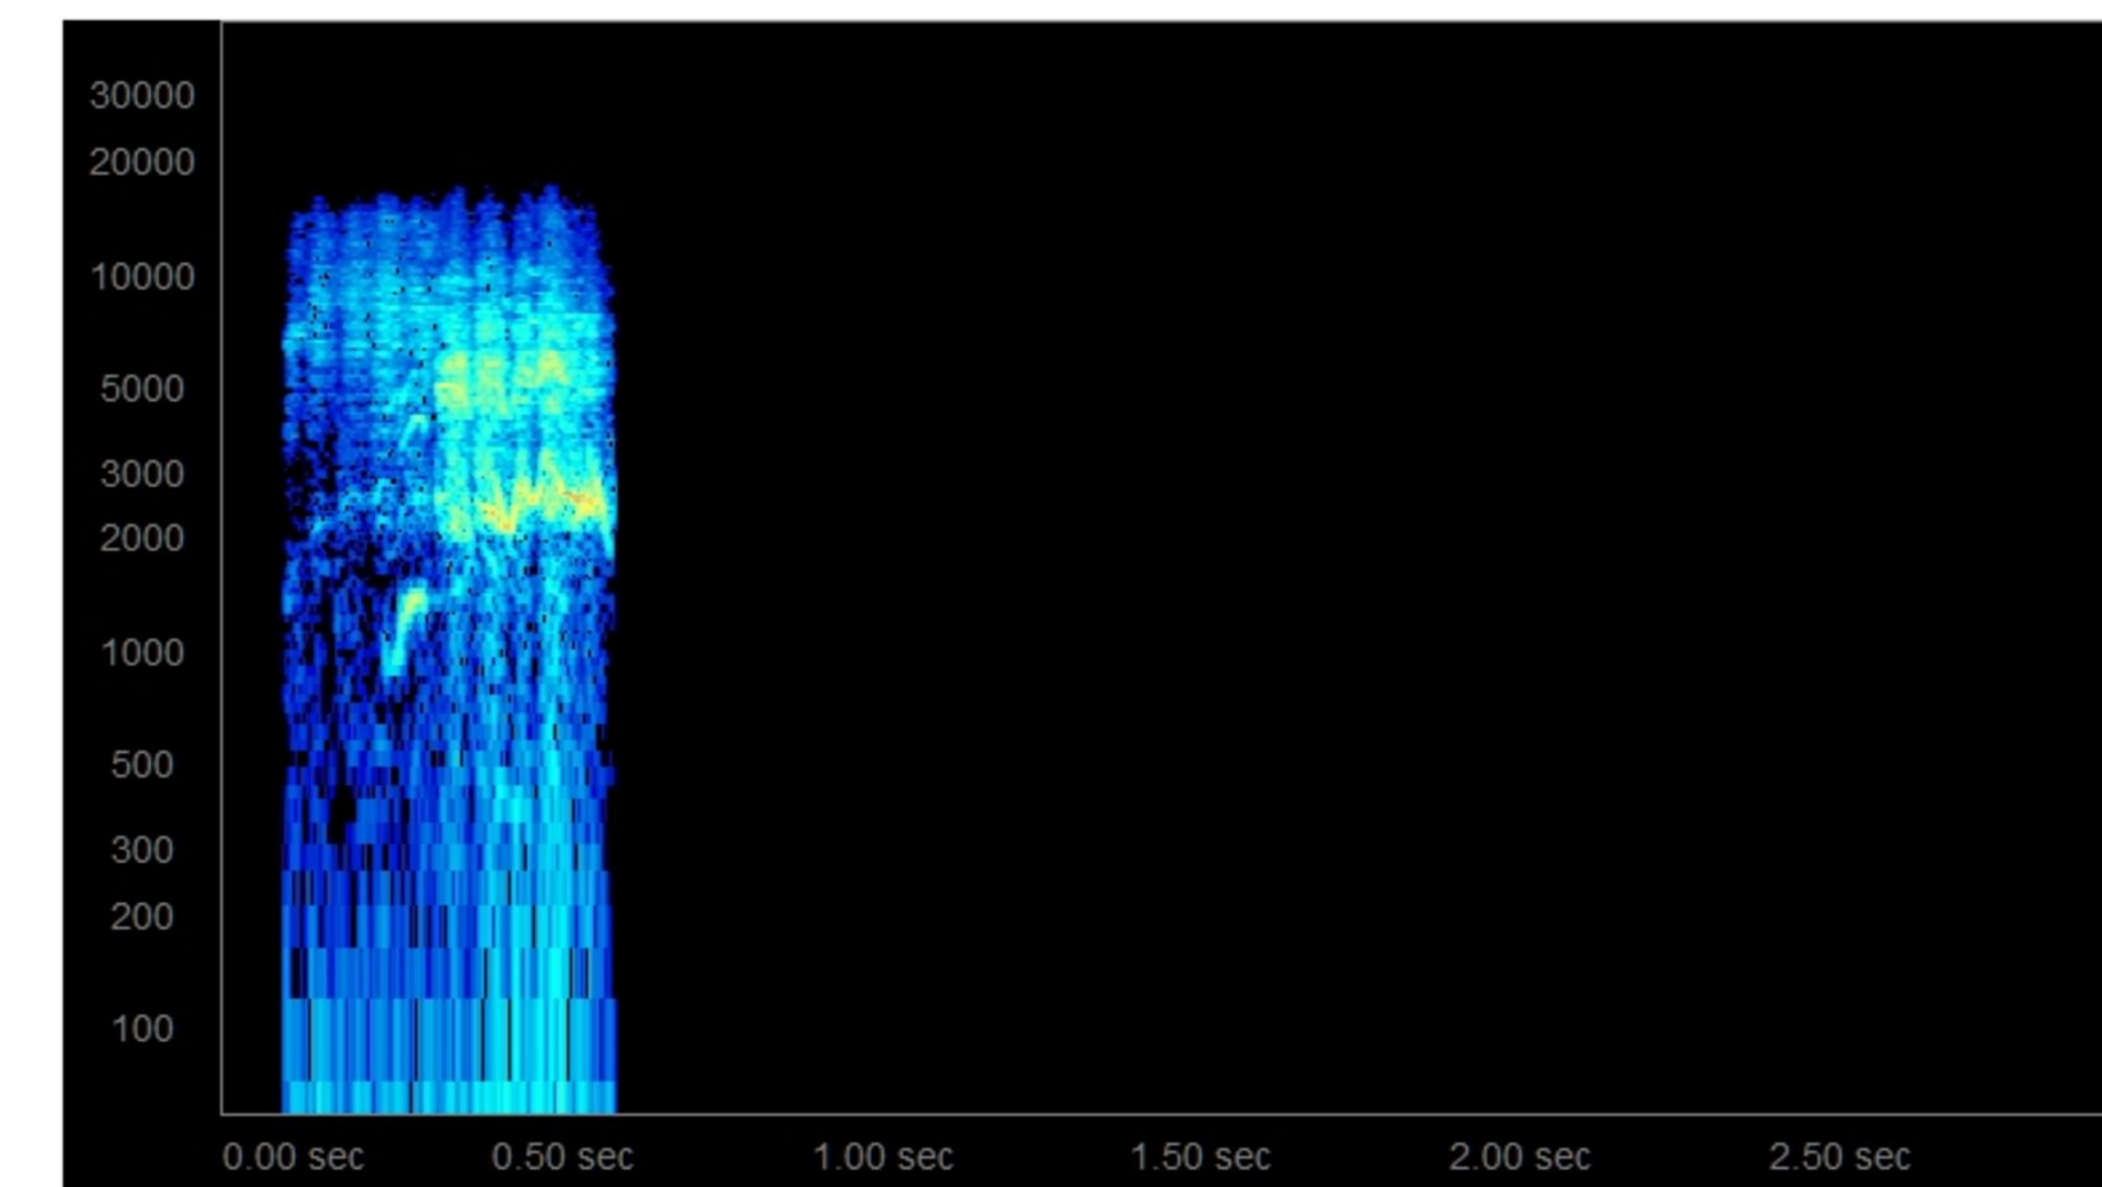

Scream 2

time [s]

Supplement: 00167.2009_1.pdf [file 00167.2009_1.pdf]

Monkey S

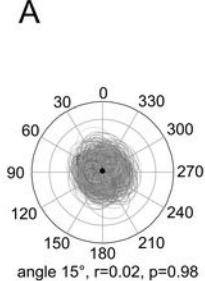

Monkey L

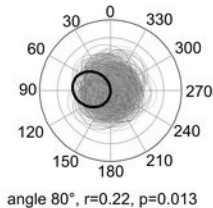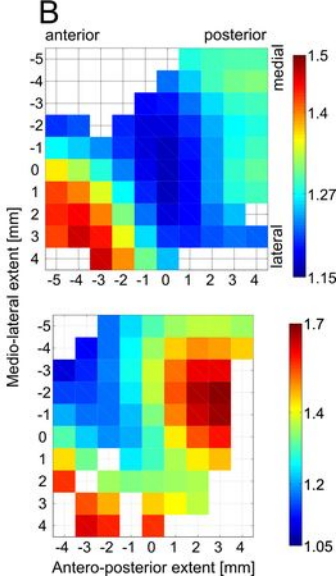

Supplement: 00167.2009_3.pdf [file 00167.2009_3.pdf]

"on"

"sustained"

"entire"

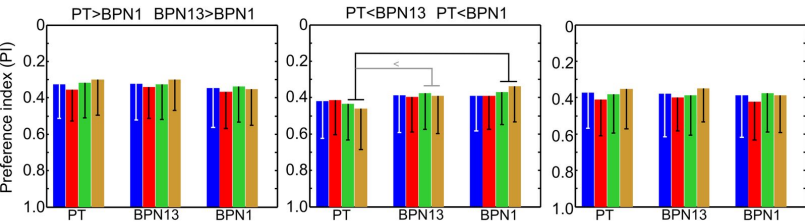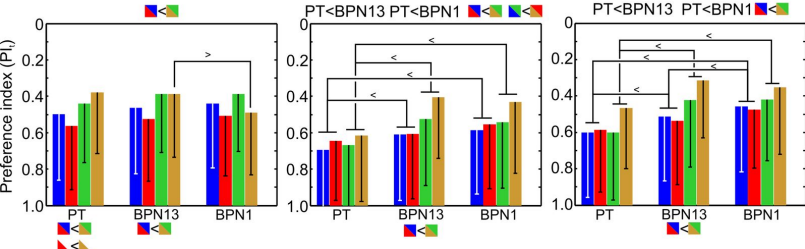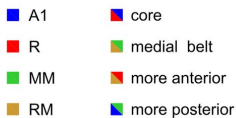

< significantly smaller selectivity

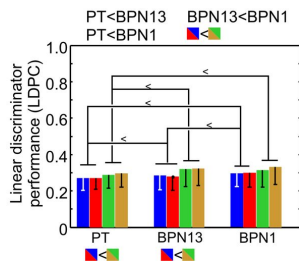

Supplement: 00167.2009_4.pdf [file 00167.2009_4.pdf]

**“on”****“sustained”****“entire”**

MC&lt;ES

MC&gt;ES

MC&gt;ES

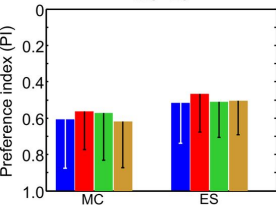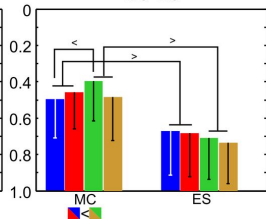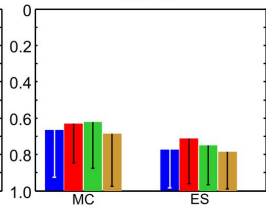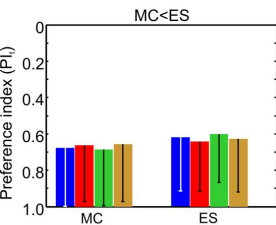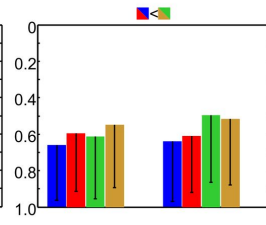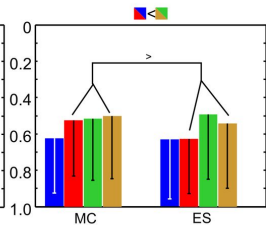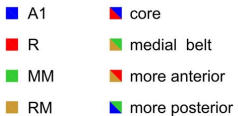

&lt; significantly smaller selectivity

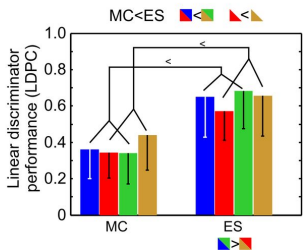

Supplement: 00167.2009_5.pdf [file 00167.2009_5.pdf]
